# 1 *Cfdp1* is Essential for Cardiac Development and Function

2 **Giardoglou Panagiota<sup>1,2</sup>, Deloukas Panos<sup>3</sup>, Dedoussis George<sup>2</sup>, Beis Dimitris<sup>1\*</sup>**

3 <sup>1</sup> Zebrafish Disease Model Lab, Center for Clinical, Experimental Surgery & Translational Research, Biomedical  
4 Research Foundation, Academy of Athens, Athens, Greece

5 <sup>2</sup> Department of Nutrition and Dietetics, School of Health Science and Education, Harokopio University of Athens,  
6 Athens, Greece

7 <sup>3</sup> Clinical Pharmacology, William Harvey Research Institute, Barts and The London Medical School, Queen Mary  
8 University of London, London, UK

9 \* Correspondence: [dbeis@bioacademy.gr](mailto:dbeis@bioacademy.gr)

10

11 Cardiovascular diseases (CVDs) are the prevalent cause of mortality worldwide and account for  
12 the most common noncommunicable disease. CVDs describe a wide spectrum of disorders  
13 affecting the proper function, physiology and morphogenesis of the heart and blood vessels.  
14 The risk of developing cardiovascular diseases is modulated by a combination of environmental  
15 and genetic effectors. Thus, it's highly important to identify candidate genes and elucidate their  
16 role in the manifestation of the disease. Large-scale human studies have revealed the  
17 implication of Craniofacial Development Protein 1 (*CFDP1*) in coronary artery disease (CAD).  
18 *CFDP1* belongs to the evolutionary conserved Bucentaur (BCNT) family and up to date, its  
19 function and mechanism of action in Cardiovascular Development is still unclear. In this study,  
20 we utilize zebrafish to investigate the role of *cfdp1* in the developing heart due to the high  
21 genomic homology, similarity in heart physiology and the ease of experimentally manipulation.  
22 We showed that *cfdp1* is expressed during development and at 120 hours post fertilization its  
23 expression is restricted to the region of the heart and the head. We then generated a *cfdp1*-null  
24 zebrafish line using CRISPR-Cas9 system which led to a lethal phenotype since *knockout*  
25 embryos do not reach adulthood. *cfdp1*<sup>-/-</sup> embryos develop arrhythmic hearts and defective  
26 cardiac performance exhibiting statistically significant differences in heart features including  
27 End Diastolic Volume, Cardiac Output, Ejection Fraction and Stroke Volume. Myocardial  
28 trabeculation is also impaired in *cfdp1*<sup>-/-</sup> embryonic hearts, implying its regulatory role also in  
29 this developmental process. Findings from both *knockdown* and *knockout* experiments showed  
30 that abrogation of *cfdp1* leads to downregulation of Wnt signaling in embryonic hearts during  
31 valve development but without affecting Notch activation in this process.

32

## 33 INTRODUCTION

34 Cardiovascular diseases (CVD) comprise a broad spectrum of cardiac defects and clinical  
35 characteristics. Multiple factors contribute to the severity of CVD traits and it still remains  
36 unclear in which extend genetics together with environmental elements lead to the disease  
37 manifestation. The suggested predisposition of the CVD appearance is currently one the main  
38 focus of research interest. Genome-wide association studies have identified thousand robust  
39 associations (genome-wide significance,  $p < 5 \times 10^{-8}$ ) between disease traits and genetic loci. To  
40 date, for coronary artery disease (CAD), 66 loci have been proposed to account for  
41 approximately 12% of CAD heritability<sup>1-4</sup>. Moreover, it has also been reported that a larger  
42 number of putative loci is found at the false discovery rate (FDR) of 5%. Recently, a study that  
43 used UK Biobank data<sup>5</sup> to evaluate the validity of FDR loci and conducted meta-analysis using  
44 CAD GWAS identified new loci at GWAS significance that were previously on 5% FDR providing  
45 support that variants in this threshold could hold the key for higher percentage of heritability<sup>4</sup>.

46 Findings from human studies trying to analyze the genetic architecture of normal heart  
47 physiology, link the cardiac structure and function with SNPs (single nucleotide polymorphisms)  
48 in identified genetic loci. A list of recent publications derived from analysis of GWAS human  
49 data have highlighted the involvement of *CFDP1* (craniofacial development protein 1) in the  
50 determinants of risk factors for CAD, blood pressure, aortic diameter and carotid intima-media  
51 thickness raising the interest for deeper understanding of the functional analysis of *CFDP1* gene  
52 in cardiovascular development and function<sup>6-9</sup>.

53 The human *CFDP1* is a protein-coding gene belonging to the evolutionary conserved Bucentaur  
54 (BCNT) superfamily which is classified by the uncharacterized BCNT domain of 80 amino acids  
55 (aa) at the C-terminal region. It is located at the reverse strand of chromosome 16, consists of 7  
56 exons, which encodes for a protein product of 299 aa and it is flanked by the *BCAR1* (breast  
57 cancer antiestrogen resistance 1) and *TMEM170A* (transmembrane protein 170A) genes. The  
58 BCNT protein family is widespread among the species and their orthologues are also found in  
59 yeast *Saccharomyces cerevisiae* (SWC5), fruit fly *Drosophila melanogaster* (YETI), mouse *Mus*  
60 *musculus* (CP27) and zebrafish *Danio rerio* (RLTPR or CFDP1)<sup>10</sup>. The fact that BCNT is

61 evolutionary conserved implies the important role of this superfamily, which was first detected  
62 in bovine brain extracts using monoclonal antibodies against a rat GTPase-activating protein  
63 with the same epitope<sup>11</sup>. Although *CFDP1* gene is highly conserved, there is limited knowledge  
64 about its function and role not only in cellular level but also in level of organism. Yeast *Swc5*  
65 gene is essential for optimal function of chromatin remodeler SWR which has histone exchange  
66 activity in an ATP-dependent manner<sup>12-14</sup>. Studies in *Drosophila melanogaster* have shown that  
67 loss of BCNT gene, *Yeti* causes lethality before pupation and that mechanistically provides a  
68 chaperon-like activity that is required in higher-order chromatin organization by its interaction  
69 with histone variant H2A.V and chromatin remodeling machinery<sup>15</sup>. In the same context,  
70 functional analysis of zebrafish *cfdp1* has shown evidence for its role in craniofacial structure  
71 and bone development<sup>16</sup>. Mammalian BCNT proteins have also been characterized as molecular  
72 epigenetic determinants via their association with chromatin-related proteins<sup>17</sup>. Mouse BCNT  
73 gene, *cp27* was suggested to mediate early organogenesis and high level of its expression was  
74 demonstrated in developing mouse teeth, heart, lung and liver<sup>18-20</sup>. Thus, while there are  
75 sparse studies accessing the role of *cfdp1* in chromatin remodeling complex via the  
76 maintenance of chromosome organization<sup>21,22</sup>, little is known about not only its function and  
77 the mechanism it is involved in but also its role in heart physiology and morphogenesis.  
78 Recently, it was shown that the zebrafish *gazami* mutants carry a point mutation in the 3' end  
79 of the gene, resulting in a truncated protein<sup>23</sup>. It is proposed that *cfdp1* controls neural  
80 differentiation and cell cycle in the cerebellum and retina, however its role in the heart was not  
81 studied.

82 Since, GWAS studies have revealed the implication of CFDP1 in the risk of CAD in humans, it is  
83 essential to unravel how *cfdp1* affects the proper development and function of the heart. For  
84 this purpose, we utilized zebrafish as model organism as it has emerged to be a valuable  
85 vertebrate tool in order to model human cardiovascular development and diseases<sup>24-26</sup>. The  
86 physiology of zebrafish development offers a precious advantage to study mutations that result  
87 in early embryonic lethality. For instance, mutations in the Cardiac troponin T (cTnT), also  
88 known as *sih* (*silent heart*) mutants exhibit a non-contractile heart phenotype, the *sih* embryos  
89 survive up to 5dpf (days post fertilization) as they uptake adequate oxygen through diffusion

90 and are not dependent on a functional cardiovascular system and blood circulation until that  
91 developmental stage<sup>27</sup>. This ability allows the characterization of mutations that are embryonic  
92 lethal to other vertebrate models.

93 In this work, we aimed to study the previously unappreciated role of *cfdp1* during the  
94 development of the embryonic heart in order to elucidate its involvement in proper cardiac  
95 function. We showed evidence that cardiac expression of *cfdp1* is apparent during early  
96 developmental stages and plays an important role in myocardial trabeculation. As a  
97 consequence of *cfdp1* abrogation, embryos display heart dysfunction, contractility impairment  
98 and arrhythmias supporting its role on proper cardiac performance. In addition, mutant *cfdp1*  
99 embryonic hearts exhibit downregulation of Wnt signaling pathway in the mesenchymal cells of  
100 the inner valve region during valvulogenesis without affecting Notch activation in this process.  
101 Thus, loss of *cfdp1* affects directly or indirectly via cardiac function, valve development. *cfdp1*<sup>-/-</sup>  
102 mutants and a percentage of heterozygous do not survive to adulthood as their heart develop  
103 severe arrhythmias and stop by 10 days post fertilization, suggesting a partially dominant  
104 phenotype of *cfdp1* loss of function.

105

## 106 **MATERIALS AND METHODS**

### 107 **Fish housing and husbandry**

108 Adult zebrafish were maintained and embryos were raised under standard laboratory  
109 conditions, at 28°C at a day-night cycle according to the Recommended Guidelines for Zebrafish  
110 Husbandry Conditions<sup>28</sup>. The zebrafish transgenic reporter lines used in the study were  
111 Tg(*myl7:GFP*) (also known as Tg(*cmlc2:GFP*)) for myocardium<sup>29</sup>, Tg(*fli1:EGFP*)<sup>30</sup> for endothelial  
112 cells, Tg( *Tp1:mCherry*) for Notch-responsive cell<sup>31</sup> and Tg(*7xTCF-Xla.Siam:nlsmCherry*)<sup>32</sup> for  
113 Wnt-activated cells. CRISPR induced mutations to study cardiovascular genes, genotyping and  
114 adult handling of animals experimentation protocols were approved from the Bioethics and  
115 Animal committees of BRFAA and the Veterinary department of Attica region (numbers 247914  
116 and 247916, 08/04/20) for facility EL 25 BIOexp 03. Embryos and larvae were anaesthetized by  
117 adding 0.4ml tricaine 0.4% (MS-222, Ethyl 3-aminobenzoate methanesulfonate salt) (Apollo  
118 Scientific, cat.# BIA1347) in 25ml E3 embryonic water at a final concentration of 0.0064% (v/v).  
119 Pigmentation of 24hpf embryos was prevented by adding phenylthiourea (PTU, Aldrich P7629)  
120 in E3 embryonic water at a final concentration of 0.003%

### 121 **gRNA and Cas9 mRNA synthesis**

122 Identification and design of target sites to specifically knock-out *cfdp1* gene was performed by  
123 using the online CRISPR design tool CHOP-CHOP (<https://chopchop.cbu.uib.no/>). The selected  
124 target site is located in exon 3 and the sequence is 5'-CAGTAGGAGACATTGAAGAGCGG-3'.  
125 CRISPR gRNA mutagenesis was designed according to Jao et al., 2013 and briefly, the protocol  
126 used is as follows: The oligos were synthesized, annealed and cloned in pT7-gRNA (Addgene  
127 plasmid #46759). After E.coli transformation, selection of clones and identification of correct  
128 ones with diagnostic digestions to confirm the loss of BglII cutting site after successful insertion  
129 of target site, samples were Sanger sequenced. Following, the gRNA-vector was linearized by  
130 BamHI and purified. In vitro transcription of gRNA was performed using the T7 High Yield RNA  
131 Synthesis Kit (New England Biolabs, E2040S) and generated gRNA was purified. For making nls-  
132 zCas9-nls mRNA, the DNA vector pT3TS-nCas9n (Addgene plasmid #46757) was linearized by

133 XbaI digestion and purified. In vitro transcription of capped Cas9 mRNA was performed using  
134 mMESAGE mMACHINE T3 Transcription Kit (Invitrogen, AM13480).

### 135 **Microinjection in zebrafish embryos**

136 Microinjections were performed either directly into one-cell-stage zebrafish embryos or in the  
137 yolk underneath the one-cell-stage embryo. The final concentration of injection mixture for the  
138 generation of *cfdp1* mutant line was: 300ng/μl Cas9 mRNA, 50-100ng/μl gRNA, 10% (v/v)  
139 Phenol Red, 20mM HEPES and 120mM KCL. *cfdp1* ATG-blocking morpholino was synthesized by  
140 GeneTools, LLC and the sequenced that was used is TCTGAATAATTCATTCTTGTGTCGT. The final  
141 concentration of antisense *cfdp1* morpholino used 0.4mM MO and 10%(v/v) Phenol red.

### 142 **Tail amputations**

143 Adult zebrafish were immersed in fish system water with anesthesia (MS-222) for  
144 approximately 3 min. Then, caudal fins were amputated using fine scissors and zebrafish  
145 recovered by placing them in recovery tank and flushing the gills with fresh water. Caudal fins  
146 were placed in appropriate tube for further genotyping analysis.

### 147 **Sequencing and electrophoresis-based genotyping**

148 DNA from zebrafish embryos and adult fish was extracted and target region of *cfdp1* was PCR  
149 amplified using flanking genomic primers: forward, 5- GGAGGCCTCAAACCTGGTGGAG-3' and  
150 reverse, 5-CTTCTGAGAGCTTGCACTTGG-3'. Amplicons were then prepared for Sanger sequence  
151 after product cleaning using ExoSAP (New England Biolabs, #M0293S, #M0371S). Alternatively,  
152 amplicons were visualized on a 2% agarose gel after diagnostic digestion to confirm the loss of  
153 Sapl-cutting site inside the target site.

### 154 **RNA isolation and cDNA synthesis**

155 Larvae were collected at different developmental stages, euthanized, transferred in 2ml tube  
156 containing 300μl TRI Reagent (Sigma-Aldrich, T9424) and homogenized. Extracted total RNA  
157 was reverse transcribed into cDNA using PrimeScript RT reagent Kit (TaKaRa RR037a) according  
158 to manufacturer's instructions, using 500ng RNA per cDNA synthesis reaction.

## 159 **RT-PCR**

160 For reverse-transcription PCR, synthesized cDNA was template for PCR amplification and  
161 primers that were used at this study are listed: *cfdp1*, forward: 5'- GAGACATTGAAGAGCGGCAG-  
162 3', reverse: 5'- CGACTTCTCCAGAGTGCTCA-3'; *actin-2b*, forward: 5'-CGAGCTGTCTTCCCATCCA-3',  
163 reverse: 5'-TCACCAACGTAGCTGTCTTTCTG-3'. Quantification was performed in ImageJ Software  
164 and relative expression was normalized to *actin-2b* as a reference gene.

## 165 **Whole-mount *in situ* hybridization**

166 Whole-mount RNA *in situ* hybridization (ISH) using *cfdp1* antisense probe was performed in  
167 embryos, according to The Zebrafish Book<sup>33</sup>. Primers for the generation of *cfdp1* probes were  
168 forward, 5'- GAGACATTGAAGAGCGGCAG-3' and reverse, 5'- CGACTTCTCCAGAGTGCTCA-3'.

## 169 **Whole-mount immunohistochemistry**

170 Zebrafish embryos were fixed with 4% paraformaldehyde overnight at 4°C and washed 3 times  
171 for 30min with PBS. Then samples were washed 3 times for 15 min with PBT (0.8% Triton X-100  
172 in PBS) and incubated overnight at 4°C in phalloidin-633 (1:300 in PBT) for filamentous actin  
173 staining. Samples were then rinsed 3 times and washed 4 times for 15 min with PBT before  
174 mounting.

## 175 **Imaging**

176 Zebrafish embryos were anaesthetized with 0.006% (v/v) Tricaine, placed dorsally on separate  
177 cavities of a glass slide (Marienfeld Superior, 10622434), mounted on 1,2% low-melting agarose  
178 and a drop of E3 embryonic water was added on top of semi-solidified mounting medium for  
179 maintenance of humidity. For *in vivo* imaging, fluorescent and brightfield videos of 10sec were  
180 recorded by microscope inverted Leica DMIRE2 with a mounted Hamamatsu ORCA-Flash4.0  
181 camera. Confocal imaging was performed using a Leica TCS SP5 II on a DM 600 CFS Upright  
182 Microscope. The images were captured with the LAS AF software, analyzed in ImageJ Software  
183 and presented as maximum projection of a set of z-stacks for each stained tissue section.

## 184 **Adult zebrafish heart isolation and Histology**

185 Adult zebrafish were euthanized in 0.016% tricaine containing 0.1M potassium chloride to  
186 arrest the heart chambers in diastole<sup>34</sup>. Images of whole hearts were captured using  
187 DFK2BUC03 camera from The Imaging Source mounted on SMZ1000 stereoscope. Then, adult  
188 hearts were fixed in 4% paraformaldehyde at 4°C overnight, washed three times with PBS,  
189 dehydrated in EthOH, and embedded in paraffin. Paraffin sections of 5µm thickness were  
190 performed using Leica RM2265 microtome. Haematoxylin and Eosin staining according to  
191 standard laboratory protocols. Images of stained sections were capture with Leica DFC500  
192 camera mounted on Leica DMLS2 microscope.

### 193 **Estimation of cardiac function**

194 High-speed videos of 30 frames per seconds and of 10sec duration taken under Leica DMIRE2  
195 microscope were used to measure and calculate heart features. Heart rate (bpm, beats per  
196 minute) was calculated by counting the number of heart beats over the period of video and  
197 calculating the rate over 60sec. Derived from the still images of the videos, long-axis (lax) and  
198 short-axis (sax) of the ventricle during end diastolic and end systolic were measured and the  
199 average of three end diastolic and three end systolic per embryo was used to calculate  
200 ventricular volumes. Assuming that shape of ventricle is a prolate spheroid, the EDV and ESV  
201 were calculated using the following standard formula:  $V = (1/6) \times \pi \times (sax)^2 \times (lax)$  <sup>35</sup>. Stroke  
202 volume was calculated by:  $SV = EDV - ESV$ . Cardiac Output was calculated by:  $CO = \text{Heart rate} \times SV$ .  
203 Ejection Fraction was calculated by:  $EF (\%) = SV/EDV \times 100$ . And Shortening Fraction was  
204 calculated by:  $SF = (lax_{(d)} - lax_{(s)}) / lax_{(d)}$ .

### 205 **Statistical analysis**

206 Statistical differences between mutants and wildtype siblings were determined using two-tailed  
207 Student's test. Statistical analysis and plotting were carried out in GraphPad Prism (version 5.03  
208 for Windows). All data presented as mean  $\pm$  SEM and *p*-value was considered significant \**p*  $\leq$   
209 0.05, \*\* *p*  $\leq$  0.01, \*\*\* *p*  $\leq$  0.001.

210

211



## 212 **RESULTS**

### 213 **1. Expression profile of zebrafish *cfdp1* gene during embryonic development**

214 Albeit, the BCNT (Bucenaur) protein superfamily is highly conserved between species, their  
215 functional role remains unclear<sup>10</sup>. Previous studies, on model systems such as yeast  
216 *Saccharomyces cerevisiae* (SWC5)<sup>13,36</sup>, *Drosophila melanogaster* (YETI)<sup>15</sup> and human cell lines  
217 (CFDP1)<sup>22</sup> homologues have shown an important role during development by providing activity  
218 in chromatin remodeling organization. Two recent studies on zebrafish *cfdp1* linked the  
219 function of the gene with proper osteogenesis and craniofacial development focusing on the  
220 abundant *cfdp1* expression at the region of head<sup>37</sup>. Itoh et al., 2021, showed defective neuronal  
221 differentiation, particularly Vglut1 and Neurod1. In our study, we first analyzed the  
222 spatiotemporal expression of *cfdp1* during the development of zebrafish embryos, focusing on  
223 the cardiac area.

224 We performed whole mount *in situ* hybridization (ISH) with a specific *cfdp1* antisense RNA  
225 probe in wild-type embryos to investigate its expression pattern during development. At the  
226 first developmental stages, *cfdp1* expression is observed at the anterior part of the organism  
227 and at 120hpf the *cfdp1* expression is mainly detected at the cephalic region and the  
228 developing heart (Figure 1A). Control embryos that were hybridized with sense *cfdp1* RNA  
229 probe showed no staining pattern (data not shown). In addition, semi-quantitative reverse  
230 transcription PCR with total RNA extracted from wild-type zebrafish embryos at different  
231 developmental stages (5hpf – 120hpf) showed that *cfdp1* transcripts are detected from the first  
232 stages of development suggesting that maternal *cfdp1* mRNA is provided (Figure 1B). To further  
233 investigate the cardiac *cfdp1* expression at this later developmental stage, 120hpf ISH-stained  
234 embryos were collected, embedded in paraffin and cut in 5µm tissue sections via microtome.  
235 The histology analysis showed that *cfdp1* is expressed at the surrounding layer of the heart  
236 (Figure 1C). These data reveal, for first time, that *cfdp1* might play an important role in  
237 zebrafish developing heart.

238

239        **2. Silencing of *cfdp1* expression reduces activation of Wnt pathway in the embryonic**  
240        **heart but Notch signaling remains unaffected**

241        After the demonstration that *cfdp1* is also expressed in the zebrafish heart, it is important to  
242        address questions which concern the function of the gene during development. To achieve this,  
243        we first aimed to investigate *in vivo* the phenotypic characterization of embryos upon silencing  
244        of *cfdp1* expression via antisense morpholino oligonucleotide (MO)-mediated knockdown  
245        experiments. Therefore, we initially injected *cfdp1* translation-blocking MO in one-cell-stage  
246        wild-type embryos and then incubate them at 28°C up to 120hpf for monitoring. Figure 2A,A'  
247        shows the phenotypic scoring of *cfdp1* morphants compared to the control sibling embryos.  
248        The majority of injected embryos develop pericardial oedema, from severe heart balloon shape  
249        to moderate oedema, along with craniofacial malformations, defects in otoliths and body  
250        curvature. The heart malformations of the *cfdp1* morphants phenotype affirmed the role of  
251        *cfdp1* in proper cardiac development and function.

252        Next, based on the importance of Notch and Wnt signaling pathways on the proper  
253        development, morphogenesis and function of the embryonic heart, we investigated whether  
254        these major regulator pathways are affected in *cfdp1* morphant embryos. We first investigated  
255        the Wnt/ $\beta$ -catenin signaling activity using the Wnt reporter line *Tg(7xTCF-Xla.Siam:nlsMCherry)*.  
256        It has previously shown that Notch and Wnt has different activity patterns since Wnt activity is  
257        primary located at the abluminal cells of the valves possibly mediating Epithelial-to-  
258        Mesenchymal Transition (EMT) of endocardial cells by increasing cell invasion during valve  
259        formation<sup>39</sup>. We crossed *Tg(fli1:EGFP)* (enhanced *GFP* expression under the endothelial specific  
260        promoter *fli1*) with *Tg(7xTCF-Xla.Siam:nlsMCherry)* and injected the *cfdp1* morpholino. We  
261        observed a significant downregulation of Wnt activity in the *cfdp1* morphants as they appear to  
262        have from reduced to complete absent signal of the Wnt reporter in the region of the heart  
263        (Figure 2B), (whereas reporter signal remains unaffected at the rest of the embryo,  
264        Supplementary Figure 1).

265        We then utilized the transgenic lines: *Tg(myI7:GFP)* to visualize myocardial cells and  
266        *Tg(Tp1:mCherry)* which indicate Notch-activated cells as the expression of *mCherry* is driven by

267 the Notch-responsive element *Tp1. notch1b* is initially expressed throughout the endocardium  
268 of the heart and then becomes restricted at the valve-forming region and more specifically at  
269 the luminal endocardial cells of immature valve leaflets<sup>38,39</sup>. *cfdp1*-MO injected embryos  
270 showed no differences in the Notch reporter activation compared to control siblings at 72hpf  
271 (Figure 2C). Collectively, these findings show that *cfdp1* silencing affects Wnt/ $\beta$ -catenin but not  
272 Notch signaling indicating that *cfdp1* plays different role in these two stages and types of  
273 valvular cells.

274

### 275 **3. Generation of zebrafish *cfdp1* mutant line**

276 After the *in vivo* characterization of *cfdp1* morphants that suggested a role of *cfdp1* in the  
277 developing heart of zebrafish embryos which was previously unknown, we generated a knock-  
278 out *cfdp1* mutant line to circumvent any phenotypic discrepancies between morphants and  
279 mutants, previously reported<sup>40</sup>. Zebrafish *cfdp1* gene is located on chromosome 18 and consists  
280 of 7 exons, which encode for a protein of 312 amino acids (aa). In order to generate a mutation  
281 within the gene, we designed *cfdp1* guide RNAs (gRNAs) for CRISPR-Cas9-induced mutagenesis  
282 to target specific location according to published instructions (Jao *et al.*, 2013)<sup>41</sup>. We utilized  
283 the online tool CHOPCHOP (<https://chopchop.cbu.uib.no/>) and we targeted exon three as it  
284 scored at the highest ranking and efficiency rate (Figure 3A). The mixture of *cfdp1* gRNA and  
285 Cas9 mRNA was then injected at one-cell-stage embryos of the *Tg(myf7:EGFP)* line and the  
286 efficiency of the induced mutation was verified by Sanger sequencing of the flanking region  
287 around the target site of the injected embryos. Specifically, at 24hpf a pool of injected embryos  
288 was collected, DNA was extracted and a 350bp fragment across the target site was PCR  
289 amplified. The efficacy of guide RNA (and therefore the induction efficiency of somatic  
290 mutation) was assessed via DNA sequencing. Following, F0 fish were raised until adulthood  
291 when they were crossed with wild-type individuals to identify mutant founders and confirm  
292 that the induced mutation was transmitted to the F1 (Figure 3B).

293 A family of F1 carriers was selected, and the responsible mutated allele was characterized to be  
294 a deletion of five nucleotides. This caused a frameshift leading to an introduction of premature

295 stop codon and as a result to the production of a truncated protein. More specifically, the  
296 deletion of AAGA before the PAM sequence of target site is predicted to result in a truncated  
297 product of 114aa, that have 107aa of the wild-type *cfdp1* protein and seven new aa before  
298 harboring the premature stop codon (Figure 3C). The highly conserved BCNT domain that  
299 resides at the C-terminal domain (exon six and exon seven) is also absent in the resulting  
300 truncated product. Additionally, the deletion of mutant allele led to the loss of the unique *SapI*  
301 cutting site in the surrounding area of the target site, which was subsequently used as a  
302 verification of *cfdp1* genotyping after diagnostic digestion of extracted DNA samples of *cfdp1*  
303 siblings (Supplementary Figure 2).

#### 304 **4. Zebrafish *cfdp1* mutants show impaired cardiac performance**

305 Following the generation of *cfdp1* mutant line, we examined the phenotype of homozygous  
306 embryos and tried to raise homozygous adults. Intriguingly, homozygous mutant larvae did not  
307 reach adulthood and survived up to 10-15dpf. From a *cfdp1*<sup>-/+</sup> cross we could only genotype  
308 adult heterozygous and wild-type. Thus, we proceeded to study the *cfdp1* role during  
309 development and early heart morphogenesis. Embryos from a *cfdp1*<sup>-/+</sup> cross did not exhibit any  
310 gross phenotypic cardiac morphogenic malformations, but when monitored at 5dpf, we  
311 detected that a 27,8% of them suffered from cardiac arrhythmias (N=3, n=141) (Fig. 4A'). We,  
312 then carefully selected the individuals that have manifested the observed heart dysfunction and  
313 sequenced them, in order to identify their genotype. Interestingly, we discovered that not only  
314 homozygous *cfdp1*<sup>-/-</sup> but also portion of heterozygous *cfdp1*<sup>-/+</sup> siblings developed the observed  
315 heart dysfunction, while homozygous *cfdp1*<sup>+/+</sup> (wild-type siblings) and also heterozygous *cfdp1*  
316 <sup>+/+</sup> genotyped group were corresponding to the embryos without cardiac abnormalities. These  
317 findings highlighted the importance of *cfdp1* for proper heart function since homozygous  
318 mutants are larvae lethal, but also elude to a partially penetrant haploinsufficiency. In order to  
319 distinguish the homozygous *cfdp1*<sup>-/-</sup> from the heterozygous individuals that are mimicking the  
320 severe phenotype of mutants, we sequenced retrospectively the sibling embryos (Fin Clipping)  
321 and proceeded further with the analysis (anterior embryo) based on the genotyping.

322 Following, in order to assess the nature of the mutated *cfdp1* allele, we performed *cfdp1*-MO  
323 injections in one-cell stage embryos from F2 *cfdp1*<sup>-/+</sup> adult individuals incross. Data showed in  
324 figure 4A that 22,3% of injected embryos developed arrhythmic hearts, 42,1% exhibited  
325 moderated phenotype with pericardial oedema, reduced size of head/eyes, malformations of  
326 mouth opening and flat or non-fully inflated swim bladder and 7,2% were scored as severe  
327 phenotype with gross abnormalities (N=4, n= 152). Therefore, the percentage of *cfdp1*-MO  
328 injected *cfdp1* sibling embryos that develop arrhythmic hearts is slightly reduced compared to  
329 the corresponding percentage observed to *cfdp1* siblings, while the appearance of moderate  
330 and severe phenotype scoring in *cfdp1*-MO injected *cfdp1* siblings is in accordance with the  
331 corresponding observed phenotypes in *cfdp1*-MO injected wild-type embryos (Figure 4A,A').

332 We monitored *cfdp1*<sup>-/-</sup> embryos and larvae and quantified several heart features through high-  
333 speed video imaging of single individuals (a method that was previously described by Hoage et  
334 al.,2012)<sup>35</sup>. Since, among the sibling group of embryos developing cardiac arrhythmias,  
335 homozygous *cfdp1*<sup>-/-</sup> and heterozygous *cfdp1*<sup>-/+</sup> were phenotypically inconspicuous, we  
336 recorded videos of all F3 *cfdp1* siblings at 120hpf acquiring brightfield and fluorescent images  
337 due to the fact that *cfdp1* mutant line was generated utilizing *Tg(myf7:EGFP)* reporter line and  
338 carries *myf7*-driven GFP expression for cardiomyocytes visualization. Embryos were then  
339 sacrificed and retrospectively analyzed after identification of genotype via DNA sequencing of  
340 single larvae. Remarkably, *cfdp1*<sup>-/-</sup> showed significantly reduced end-diastolic volume and stroke  
341 volume as well as cardiac output and ejection fraction, compared to wild-type *cfdp1*<sup>+/+</sup> siblings  
342 (Figure 4B). This strongly demonstrates that *cfdp1* abrogation inhibits proper ventricular  
343 function and stands as a strong effector in embryonic cardiac physiology.

## 344 **5. Zebrafish *cfdp1* heterozygous develop variation in phenotype at embryonic stage**

345 Due to the phenotypic heterogeneity in the group of heterozygous *cfdp1*<sup>-/+</sup>, we initially  
346 examined whether this is a result of considerable different levels of *cfdp1* expression within the  
347 corresponding genotype group. For this, we performed whole mount ISH with *cfdp1* RNA probe  
348 in a group of F3 *cfdp1* siblings 120hpf which contained a mixed of genotypes. Following, images  
349 of all ISH-stained embryos were captured and the expression levels of *cfdp1* were quantified via

350 measuring ISH-staining pixel intensity that was analyzed using Fiji software<sup>42</sup>. This method  
351 represents an unbiased way of quantification of expression without prior knowledge of  
352 genotype. Therefore, after imaging, embryos were labelled and their genomic DNA was  
353 extracted and sequenced in order to retrospectively correlate their genotype to the quantified  
354 *cfdp1* expression levels. As expected, the heterozygous *cfdp1*<sup>-/+</sup> showed a variation range of  
355 *cfdp1* expression between low and middle levels of intensity, which could explain the  
356 demonstration of the corresponding phenotypic variation within this genotype group (Figure  
357 5A).

358 Since, some heterozygous *cfdp1*<sup>-/+</sup> reach adulthood, we then examine the structure of the heart  
359 of adult *cfdp1*<sup>-/+</sup> compared to matched age *cfdp1*<sup>+/+</sup> individuals. Here, adult fish were sacrificed  
360 and hearts were removed, sectioned and stained with Hematoxylin and Eosin for nuclear and  
361 ECM/cytoplasm staining, respectively. For accurate assessment, images of all heart sections  
362 were captured and analysis was performed on sections revealing the cardiac valves and the  
363 largest ventricular area. We observed that heterozygous *cfdp1*<sup>Δ/+</sup> showed dilated ventricle, with  
364 thinner compact myocardium and sparse trabecular myocardium, with respect to wild-type  
365 control adult fish (Figure 5B). Overall, these findings show that the respective phenotypic  
366 variability of heterozygous is reflected to the levels of *cfdp1* expression and even so, the  
367 individuals that reach adulthood develop defects in heart morphology.

## 368 **6. Zebrafish *cfdp1* mutants appear to downregulate Wnt pathway but Notch signaling** 369 **remains unaffected**

370 We wanted to verify the morpholino experiments and we investigated if *cfdp1* mutant embryos  
371 have defective Wnt or Notch signaling. For this purpose, we crossed adult heterozygous *cfdp1*<sup>-/+</sup>  
372 (generated in Tg(*myl7:EGFP*) reporter line) with Tg(7xTCF-*Xla.Siam:nlsMCherry*) individuals and  
373 then raised the double positive *egfp*<sup>+</sup>/*mCherry*<sup>+</sup>, *cfdp1*<sup>-/+</sup> offspring (for cardiomyocytes and TCF-  
374 activated cells visualization, respectively). 120hpf siblings from in-cross of adult *cfdp1*<sup>-</sup>  
375 <sup>+/+</sup>/Tg(*myl7:EGFP*)/Tg(7xTCF-*Xla.Siam:nlsMCherry*) were screened under fluorescent microscope  
376 and double positive *egfp*<sup>+</sup>/*mCherry*<sup>+</sup> larvae were genotyped (DNA samples derived posterior  
377 part of the embryo) while the anterior part was further processed and imaged to characterize

378 the phenotype. As illustrated in Figure 6A, maximum projection of z-stack imaging reveals that  
379 Wnt pathway is significantly downregulated in mutant *cfdp1*<sup>-/-</sup> compared to their wild-type  
380 *cfdp1*<sup>+/+</sup> siblings, which is appropriately in line with the observed Wnt disruption in *cfdp1*  
381 morphants.

382 We tested in a similar way the Notch signaling, which is also involved in valve formation with  
383 respect to the corresponding findings in *cfdp1* morphants. Adult heterozygous *cfdp1*<sup>-/+</sup> with  
384 Tg(*Tp1:mCherry*) individuals were crossed with a *cfdp1*<sup>-/+</sup> Tg(*myl7:EGFP*)/Tg(*Tp1:mCherry*) line.  
385 Remarkably, analogous to *cfdp1* morphants results, Notch activation pattern appears  
386 comparable to the wild-type *cfdp1*<sup>+/+</sup> siblings (Figure 6B). In summary, Notch-expressing  
387 endocardial cells are differentiated while TCF-positive mesenchymal-like valvular cells exhibit  
388 lower activation levels.

## 389 **7. Cardiac trabeculation in developing zebrafish ventricle is defective in *cfdp1* mutants**

390 Prior studies have shown that orchestration of cardiac trabeculation is highly significant for the  
391 proper function of the heart and the survival of the embryo since defects during the complex  
392 morphogenic events occurring at trabeculation lead to embryonic lethality or adult dilated  
393 cardiomyopathies<sup>43,44</sup>. It has been also shown that zebrafish *erbb2* mutant embryos lack  
394 trabeculation but they develop normal valves<sup>44</sup>. To this end, we examined the levels of cardiac  
395 trabeculation in *cfdp1* mutant embryos at 120hpf when the entire length of luminal side of  
396 ventricle has developed extensive trabeculation. Single sibling *cfdp1* embryos were genotyped  
397 at 120hpf and groups of wild-type and mutant embryos were further stained with phalloidin for  
398 filamentous actin staining (Figure 7A). Interestingly, while *cfdp1* sibling wild-type embryos  
399 develop an extensive normal pattern of trabeculation, *cfdp1* mutant embryos exhibit less  
400 complex trabeculation (Figure 7B). This finding suggests the requirement of *cfdp1* for the  
401 proper initiation and formation of trabecular cardiomyocyte layer. As we have already shown,  
402 the *cfdp1* mutant hearts do not show signs of valve malformations, so the impairment of  
403 ventricle trabeculation is not a secondary effect to valvulogenesis defect. Taken together, our  
404 data show the *cfdp1* role specifically in cardiac trabeculation and cardiac function, while it is  
405 dispensable for valve formation.



## 406 DISCUSSION

407 In this study, we revealed for first time the essential role of *cfdp1* in cardiac development and  
408 proper function of the heart. We successfully generated a CRISPR/Cas9 - induced *cfdp1* mutant  
409 line by deleting five nucleotides around the PAM sequence resulting in alteration of reading  
410 frame, introduction of seven novel amino acids followed by an early stop codon and coding of a  
411 truncated protein product (missing the evolutionary conserved BCNT domain). This was  
412 achieved by targeting an oligonucleotide region on the third exon of zebrafish *cfdp1* orthologue  
413 and identification of mutant allele after sequencing. Our work demonstrated the cardiac  
414 dysfunction upon *cfdp1* abrogation which was reflected in decreased heart features of end-  
415 diastolic volume, stroke volume, cardiac output and ejection fraction. The *cfdp1*<sup>-/-</sup> embryos do  
416 not reach adulthood as they die at approximately 10-16 dpf. We presented *in vivo* evidence of  
417 decreased ventricular trabeculation in *cfdp1* mutant hearts, while age-matched wild-type  
418 siblings showed normally developed trabecular network. In addition, *cfdp1* mutant embryos  
419 exhibited impaired contractility, bradycardia and arrhythmias, which is a characteristic  
420 observed in a small portion of *cfdp1* heterozygous embryos, as well. Interestingly, we showed  
421 that Wnt signaling in mesenchymal valvular cells is downregulated in *cfdp1* mutant hearts while  
422 they do not affect Notch activation in the atrioventricular boundary and the initiation of valve  
423 formation.

424 **Providing a valuable novel tool for phenotypic and functional characterization of *cfdp1* gene.**  
425 Biochemical and functional analysis of CFDP1 (hBCNT/CFDP1) in human cell lines (HeLa, U2OS  
426 and MRC5) identified two isoforms of 50 kDa and 35 kDa (spliced variants) found in the nucleus  
427 of the cells<sup>22</sup>. The same study suggested that the 50 kDa variant has chromatin-binding activity  
428 (while the shorter isoform obtains different characteristics) and plays an important role in  
429 chromatin remodeling and organization affecting the progression of cell cycle. Interestingly, the  
430 truncated construct Flag-CFDP1-Nt containing only the N-terminal and lacking the conserved  
431 BCNT domain (C-terminal region) was able to enter the nuclei but lost the chromatin binding  
432 activity resulting in a defective truncated product<sup>22</sup>. In our zebrafish model, the mutated *cfdp1*  
433 allele generated via CRISPR/Cas9 system lacks also the BCNT domain since early stop codon is



434 inserted close to the N-terminal region of the protein product. Based on the fact that this  
435 domain is highly evolutionary conserved between species, it is expected that *zcfdp1*<sup>-/-</sup> loses the  
436 chromatin binding activity as well, and therefore its subcellular mechanical function but this  
437 needs to be further clarified and confirmed.

438 The characterization of *cfdp1* orthologous has been largely unexplored. Both *in vitro* and *in vivo*  
439 studies on yeast (*Saccharomyces cerevisiae*) BCNT orthologue SWC5, have shown that SWC5-  
440 deleted mutants lack SWC1-mediated Htz1 histone replacement suggesting that SWC5 is  
441 required for chromatin remodeling which can impair transcription and other cellular  
442 responses<sup>36,45</sup>. In the same context, studies in *Drosophila melanogaster* have demonstrated  
443 YETI, the BCNT member to be a multifaceted chromatin protein found in cell nuclei whereas its  
444 depletion in *Yeti* mutants leads to lethality before pupation<sup>15</sup>. *Yeti* binds to chromatin via its  
445 BCNT domain and interacts with both H2A.V variant and HP1a and it is proposed that YETI  
446 participates in the control of transcription initiation or the chromatin integrity. The first  
447 evidence of heart localization of BCNT genes during development comes from embryonic  
448 mouse studies revealing that CP27, the BCNT orthologue, is expressed in the developing heart  
449 (E8-E10), as well as organs like brain neuroepithelium, teeth, retina of the eye, otic vesicles,  
450 cerebellum and periosteum developing bones and in most cases, CP27 signal expression is  
451 found in epithelial-mesenchymal boundary in developing tissues (except dental pulp and  
452 periosteum)<sup>18</sup>. Later on, CP27 loss of function in mouse embryonic fibroblast cell line BALB/c  
453 3T3 showed reduction in fibronectin matrix composition and redistribution of extracellular  
454 matrix (ECM) organization, suggesting that CP27 has a regulative effect on ECM and cellular  
455 changes<sup>20</sup>. It is known that ECM synthesis and remodeling promotes trabecular rearrangements  
456 and trabecular network growth in non-compaction cardiomyopathy (NCC) mouse model and it  
457 has been shown that fibronectin exhibit similar pattern to *Has2*, *Vcan* and CD44 (a hyaluronan  
458 receptor), which are ECM synthesis genes essential for trabeculation<sup>46</sup>. Therefore, a possible  
459 involvement of CP27 in ECM remodeling during ventricular trabeculation in mice, should also be  
460 investigated.

461 Genome-wide association studies have unraveled multiple genome loci associated with human  
462 diseases. A recent study performed deep transcriptomic analysis of genotyped primary human  
463 coronary artery smooth muscle cells (HCASMCs) and coronary endothelial cells (HCAECs) from  
464 the same subjects and analyzed GWAS loci associated with vascular disease and CAD risk, in  
465 these two coronary cell types<sup>47</sup>. Researchers found *CFDP1* (along with *YAP1* and *STAT6*) for  
466 HCAECs that passed the 5% false discovery level (FDR) correction at the gene level which  
467 associates *CFDP1* with artery disease traits<sup>47</sup>. Another study which applied a 2-stage discovery  
468 and replication study design with more than 15000 individuals, identified an association of a  
469 novel SNP in the last 3' intron of *CFDP1*, rs4888378, with carotid intima-media thickness (cIMT),  
470 an established marker for subclinical atherosclerotic cardiovascular disease<sup>9</sup>. A different study  
471 identified another *CFDP1* variant, rs3851738, as CAD-associated locus after analysis from UK  
472 Biobank and CARDIoGRAMplusC4D 1000 Genomes imputation study, and following 'phenome-  
473 wide association study' (PheWas) correlated this variant with systolic blood pressure<sup>48</sup>. In the  
474 same context, GWAS studies have shown correlation of human *CFDP1* with aortic root  
475 diameter, as well as CAD risk<sup>6,49</sup>.

476 Thus far, *in vivo* studies clarifying specifically the involvement of *cfdp1* in cardiac development  
477 are voided. A detailed phenotypical and functional analysis of the GWAS-derived *CFDP1* is  
478 essential to shed light to the way of action and its determinant role in cardiovascular  
479 physiology. The present work provides evidence for first time about the fundamental effect of  
480 *cfdp1* in proper heart morphogenesis and function in zebrafish. The observed phenotype of  
481 bradycardia and arrhythmias is an observation with potential clinical relevance for *CFDP*  
482 carriers and their risk to develop CAD.

483

484

485 ***cfdp1* knockdown and knockout zebrafish models demonstrated similar but not identical**  
486 **results.**

487 Targeted knockdown of genes via MO injections is distinguishable from stable genetic lines  
488 which inherit the induced change, since MOs are gradually degraded within few days and  
489 therefore result in a transient effect. Despite that fact, knockdown approach in zebrafish  
490 remain an *in vivo* phenotypic assay to investigate the effect of gene depletion upon blocking of  
491 their expression. Our data showed that *cfdp1* morphants develop phenotypic abnormalities,  
492 such as pericardial oedema, craniofacial malformations and hypoplastic swim bladder (arrest of  
493 swim bladder inflation has been proposed to be a secondary event to heart failure, since in  
494 *silent heart* morphants that lack heart contractility, heart-specific constitutively activated AHR  
495 signaling and TCDD-exposed zebrafish models which develop heart failure, the swim bladder  
496 development is inhibited in the same manner<sup>50</sup>). Interestingly, the *cfdp1* mutants exhibit more  
497 mild phenotypic characterization by developing arrhythmic embryonic hearts but not  
498 pericardial oedema or extreme craniofacial disorders compared to *cfdp1* morphants at 120hpf.  
499 At the same context, when we investigated the effect of *cfdp1* depletion in Wnt signaling  
500 pathway at *cfdp1* morphant hearts, we observed major reduction in signal intensity or even  
501 complete blockage of expression pattern in Wnt-activated cells of Tg(7xTCF-  
502 *Xla.Siam:nlsCherry*) reporter line, while *cfdp1* mutant hearts show strong inhibitory effect  
503 without total silence of Wnt pathway. The differences in manifest of *cfdp1* depletion between  
504 knockout and knockdown embryos could possibly be accounted for by the activation of a  
505 genetic compensation response, which has been previously proposed to explain phenotypic  
506 discrepancies in morphants and mutant models<sup>40</sup>.

#### 507 **Variation of *cfdp1* heterozygous phenotype manifest.**

508 The generation of stable *cfdp1* zebrafish mutant line resulted in the induction of a deleterious  
509 mutation caused by harboring a premature termination codon (PTC) in *cfdp1* sequence.  
510 Detailed phenotypic study of *cfdp1* sibling embryos unveiled the arrhythmic hearts of *cfdp1*<sup>-/-</sup>  
511 embryos. Notably, the same phenotype emerged in a range of heterozygous *cfdp1*<sup>-/+</sup> embryos  
512 that made them undistinguished from the *cfdp1* mutants. We further investigated whether this  
513 could be a result of variation in *cfdp1* expression levels and indeed, we detected differences in  
514 signal intensity within *cfdp1*<sup>-/+</sup> embryo pool, suggesting that this could modulate the phenotypic

515 variation of heterozygous zebrafish. Our data support the existence of heterogeneity (variation  
516 of phenotype) in heterozygous *cfdp1* siblings (same genotyping group) and the possible  
517 correlation of wild-type/mutated copies and phenotypic outcome. A proposed scenario for this  
518 variation holds on the activation of quality control nonsense-mediated mRNA decay (NMD) that  
519 targets flawed messenger RNAs. Since, our *cfdp1* mutation induces a PTC that is not at the last  
520 exon and is ~ 50 nucleotides upstream of the last exon-exon junction, it is well assumed that  
521 triggers NMD machinery<sup>51</sup>. It is generally known that, NMD is a surveillance pathway that  
522 degrades transcripts containing PTCs in order to maintain transcriptome homeostasis<sup>52,53</sup>.  
523 Although NMD plays a beneficial role by limiting the dominant-negative effect of mutant  
524 proteins, there is a variation in the efficiency of NMD activity in cell-, tissue- and transcript-  
525 specific differences that modulates the manifestation of a disorder<sup>52,53</sup>. Interestingly, it has also  
526 been suggested that NMD variation potentially leads to different clinical outcomes in  
527 individuals carrying the same PTC-containing mutated transcript<sup>54</sup>. For instance, patients  
528 containing the same mutation in X-chromosome develop markedly different phenotypes  
529 (Duchene Muscular Dystrophy and Becker Muscular Dystrophy, respectively) upon differentially  
530 activation of NMD, allowing the accumulation of truncated protein in one case<sup>54,55</sup>. Thus, the  
531 efficacy of NMD could vary between individuals and acts as potential modifier of disease  
532 phenotype. Therefore, the observed variability between *cfdp1*<sup>-/+</sup> individuals could also be a  
533 consequence of incomplete NMD resulting in *cfdp1* haploinsufficiency and heterogeneity  
534 observed in heterozygous carriers, but it needs to be further investigated.

### 535 **The role of *cfdp1* in ventricular trabeculation and cardiac function.**

536 After cardiac chamber formation, cellular remodeling leads to a formation of an intricate  
537 architecture through the initiation and growth of ventricular trabeculation. Numerous of  
538 signaling pathways in endocardium, myocardium and cardiac ECM are involved in the  
539 regulation of this process, such as Notch<sup>46,56</sup>, Semaphorin 3E/PlexinD1<sup>57</sup>, angiopoietin/Tyrosine  
540 kinase with immunoglobulin-like and EGF-like domains (Tie2)<sup>58</sup>, Bone morphogenic protein  
541 (BMP)<sup>59</sup>, EphrinB2/EphB4<sup>60</sup>, and most importantly Neuregulin (*nrg*) signaling which operates  
542 through ErbB receptor tyrosine kinase. E10.5 days postcoitum (dpc) *nrg1*<sup>-/-</sup> mice suffer from

543 severe impaired trabeculation, as well as increased apoptotic levels at the region of the head,  
544 reflecting its role also in cranial neurogenesis<sup>61</sup>. Similarly, null mutations in ErbB2 and ErbB4  
545 result in abrogation of ventricular trabeculation that lead to lethality between E10.5 and E11.5  
546 in mice<sup>62,63</sup>. Zebrafish *erbb2* mutant embryos lack cardiac trabeculation and develop  
547 progressive cardiac dysfunction and fatal heart failure, showing the functionally conserved role  
548 of Nrg/ErbB signaling in heart morphogenesis<sup>44</sup>. Interestingly, *erbb2* mutants exhibit normal  
549 valve morphogenesis, indicating a direct and cell-autonomous regulation of ErbB2 in cardiac  
550 trabeculation. In addition, while in *nrg1* zebrafish mutant larvae trabeculation appears  
551 unaffected and *nrg1*<sup>-/-</sup> survive to fertile adults, *nrg2a* (another member of Nrg family) mutants  
552 hearts fail to form trabeculation and suffer defects similar to *erbb2* mutants<sup>43</sup>. Notably, *nrg2a*<sup>-/-</sup>  
553 are recognized morphologically by their aberrant jaw and swim bladder inflation disorders,  
554 reminiscing of the phenotypic characterization of *cfdp1* morphant embryos. In accordance to  
555 what it was observed in *erbb2* mutants, *nrg2a* zebrafish mutants develop normal  
556 atrioventricular (AV) valves, indicating that Nrg2a/ErbB2 is dispensable for AV valve formation  
557 and it is required for proper cardiac trabeculation. Interestingly, zebrafish *tomo*-seq genome-  
558 wide transcriptional profiling<sup>64</sup> reveal similar expression pattern of *cfdp1* (previously also  
559 known as *rltpr*) and *nrg1* in regenerating heart 3 days after injury, indicating a possible  
560 functional association between the two genes. Whether *cfdp1* mechanism of action and its role  
561 in trabeculae cardiomyocytes regulation crosslinks with Nrg signaling pathway remains to be  
562 further investigated.

563 We have shown that *cfdp1* zebrafish mutants suffer from impaired trabecular network. Defects  
564 of this complex cardiac remodeling lead to embryonic lethality, which illustrates the importance  
565 of this process and the need to fully unravel the signaling molecules regulating the  
566 trabeculation in cardiac development. Mechanical forces and contractility are also important  
567 factors for the proper trabeculation network formation. Both reduction of blood flow in *weak*  
568 *atrium* (*myh6*)<sup>65,66</sup> mutants and disrupted contractility in *silent heart* (*tnnt2a*)<sup>67</sup> mutants result  
569 in severe defects in trabeculation, as well as *tnnt2a* morphants that do extend ventricular  
570 protrusions but they are less stable and frequently retract<sup>68</sup>. Disorder in trabeculae layer shown  
571 in *cfdp1* mutant embryos could be a secondary event of reduced contractility which is

572 demonstrated by reduced stroke volume and ejection fraction cardiac performances. It would  
573 be interesting to utilize the zebrafish transgenic line *Tg(cmlc2:gCaMP)*<sup>67</sup>, a cardiac-specific  
574 fluorescent calcium indicator line to monitor the cardiac conduction signal travel in *cfdp1*  
575 mutants in order to further investigate the correlation of contractility and trabeculation in  
576 *cfdp1* embryonic mutant hearts.

577 Since previous studies have illustrated that Notch and canonical Wnt/ $\beta$ -catenin signaling  
578 pathways expressed in endocardial cell are influenced by blood flow and contractility<sup>39</sup>, we  
579 investigated how modulation of contractility in *cfdp1* mutants affects the activation of these  
580 major molecular pathways. We demonstrated that Wnt/ $\beta$ -catenin signaling reporter line  
581 exhibited disrupted expression pattern, while Notch-activated cells in the corresponding  
582 reporter line didn't show any effect. The different activities of Notch and Wnt/ $\beta$ -catenin  
583 observed in *cfdp1* mutant hearts indicate the composition of two different cell subsets, in  
584 accordance to previously reported Notch-activated luminal AV cells and Wnt/ $\beta$ -catenin-  
585 activated abluminal AV cells during valve formation<sup>39,69</sup>. Moreover, it has been shown that  
586 although Notch and Wnt signaling intersect in order to promote the TCF-positive endocardial  
587 cells ingression into cardiac jelly during valvulogenesis, inhibition of Erk5-Klf2 pathway impairs  
588 canonical Wnt signaling without affecting Notch nor Dll4 activation in atrioventricular  
589 endocardial cells, confirming that these pathways are regulated independently<sup>69</sup>.

590 Cardiac conduction system is composed by pacemaker cells in sinoatrial junction,  
591 atrioventricular node and ventricular conduction system and canonical Wnt pathway has been  
592 implied to contribute during specific stages of conduction<sup>70</sup>. Canonical Wnt5b signaling has  
593 been reported to play an important role in heart contractility by promoting pacemakers  
594 cardiomyocytes differentiation transcription factors *Isl1* and *Tbx18* and inhibiting *Nkx2.5*, both  
595 in zebrafish and human pluripotent stem cells (hPSCs)<sup>71</sup>. Likewise, Wnt signaling activation (via  
596 Wnt3 ligand) promotes pacemaker lineage in mouse and human embryonic stem cells<sup>72</sup>. In *Isl1*-  
597 deficient zebrafish and mouse embryos, there is a progressive failure of contractility leading to  
598 arrhythmias and bradycardia<sup>73</sup> and it is reported that canonical Wnt/ $\beta$ -catenin signaling in  
599 zebrafish is activated in *Isl1*<sup>+</sup> cells in sinoatrial region affecting the control of heart rate<sup>74</sup>. In

600 addition, Wnt/ $\beta$ -catenin signaling in AV canal regulates specific electrophysiological properties  
601 of AVC and AV node by slowing down conduction velocity<sup>75</sup>. We reported that *cfdp1* embryonic  
602 mutant hearts exhibit arrhythmias, a phenotype indicating defects in contractility and  
603 pacemaker activity. Having highlighted the significant role of Wnt in regulating pacemaker  
604 development in zebrafish, *cfdp1* seems to function in regulatory mechanism upstream of Wnt  
605 pathway involved in cellular specification of conductivity. The mechanism of how *cfdp1*  
606 cooperates with canonical Wnt/ $\beta$ -catenin signaling remain to be elucidated.

607 In summary, the CRISPR/Cas9-induced *cfdp1* zebrafish mutant line provides an unprecedented  
608 tool to unveil novel mechanism of regulating cardiac physiology and function as well as  
609 ventricular trabeculation during embryonic development.

610

611

612

## 613 **REFERENCES**

- 614 1. Deloukas, P. *et al.* Large-scale association analysis identifies new risk loci for coronary  
615 artery disease. *Nat. Genet.* **45**, 25–33 (2013).
- 616 2. Webb, T. R. *et al.* Systematic Evaluation of Pleiotropy Identifies 6 Further Loci Associated  
617 With Coronary Artery Disease. *J. Am. Coll. Cardiol.* **69**, 823–836 (2017).
- 618 3. Ntalla, I. *et al.* Genetic Risk Score for Coronary Disease Identifies Predispositions to  
619 Cardiovascular and Noncardiovascular Diseases. *J. Am. Coll. Cardiol.* **73**, 2932–2942  
620 (2019).
- 621 4. Nelson, C. P. *et al.* Association analyses based on false discovery rate implicate new loci  
622 for coronary artery disease. *Nat. Genet.* **49**, 1385–1391 (2017).
- 623 5. Sudlow, C. *et al.* UK Biobank: An Open Access Resource for Identifying the Causes of a

- 624 Wide Range of Complex Diseases of Middle and Old Age. *PLoS Med.* **12**, 1–10 (2015).
- 625 6. Sabater-Lleal, M. *et al.* Common genetic determinants of lung function, subclinical  
626 atherosclerosis and risk of coronary artery disease. *PLoS One* **9**, (2014).
- 627 7. Sung, Y. J. *et al.* A Large-Scale Multi-ancestry Genome-wide Study Accounting for  
628 Smoking Behavior Identifies Multiple Significant Loci for Blood Pressure. *Am. J. Hum.*  
629 *Genet.* **102**, 375–400 (2018).
- 630 8. Boardman-Pretty, F. *et al.* Functional Analysis of a Carotid Intima-Media Thickness Locus  
631 Implicates BCAR1 and Suggests a Causal Variant. *Circ. Cardiovasc. Genet.* **8**, 696–706  
632 (2015).
- 633 9. Gertow, K. *et al.* Identification of the BCAR1-CFDP1-TMEM170A locus as a determinant of  
634 carotid intima-media thickness and coronary artery disease risk. *Circ. Cardiovasc. Genet.*  
635 **5**, 656–665 (2012).
- 636 10. Messina, G. *et al.* The Bucentaur (BCNT) protein family: a long-neglected class of  
637 essential proteins required for chromatin/chromosome organization and function.  
638 *Chromosoma* **124**, 153–162 (2015).
- 639 11. Nobukuni, T. *et al.* An Alu-linked repetitive sequence corresponding to 280 amino acids is  
640 expressed in a novel bovine protein, but not in its human homologue. *J. Biol. Chem.* **272**,  
641 2801–2807 (1997).
- 642 12. Sun, L. & Luk, E. Dual function of Swc5 in SWR remodeling ATPase activation and histone  
643 H2A eviction. *Nucleic Acids Res.* **45**, 9931–9946 (2017).
- 644 13. Wu, W. H. *et al.* N terminus of Swr1 binds to histone H2AZ and provides a platform for  
645 subunit assembly in the chromatin remodeling complex. *J. Biol. Chem.* **284**, 6200–6207  
646 (2009).
- 647 14. Chu, W. T. & Wang, J. Influence of sequence length and charged residues on Swc5  
648 binding with histone H2A-H2B. *Proteins Struct. Funct. Bioinforma.* **89**, 512–520 (2021).



- 649 15. Messina, G. *et al.* Yeti, an essential *Drosophila melanogaster* gene, encodes a protein  
650 required for chromatin organization. *J. Cell Sci.* **127**, 2577–2588 (2014).
- 651 16. Celauro, E., Carra, S., Rodriguez, A., Cotelli, F. & Dimitri, P. Functional analysis of the  
652 *cfdp1* gene in zebrafish provides evidence for its crucial role in craniofacial development  
653 and osteogenesis. *Exp. Cell Res.* **361**, 236–245 (2017).
- 654 17. Iwashita, S. *et al.* Mammalian Bcnt/Cfdp1, a potential epigenetic factor characterized by  
655 an acidic stretch in the disordered N-terminal and Ser250 phosphorylation in the  
656 conserved C-terminal regions. *Biosci. Rep.* **35**, 1–12 (2015).
- 657 18. Diekwisch, T. G. H., Marches, F., Williams, A. & Luan, X. Cloning, gene expression, and  
658 characterization of CP27, a novel gene in mouse embryogenesis. *Gene* **235**, 19–30 (1999).
- 659 19. Diekwisch, T. G. H., Luan, X. & McIntosh, J. E. CP27 localization in the dental lamina  
660 basement membrane and in the stellate reticulum of developing teeth. *J. Histochem.*  
661 *Cytochem.* **50**, 583–586 (2002).
- 662 20. Luan, X. & Diekwisch, T. G. H. CP27 affects viability, proliferation, attachment and gene  
663 expression in embryonic fibroblasts. *Cell Prolif.* **35**, 207–219 (2002).
- 664 21. Iwashita, S. *et al.* Overcoming off-targets: Assessing Western blot signals for Bcnt/Cfdp1,  
665 a tentative component of the chromatin remodeling complex. *Biosci. Rep.* **40**, 1–16  
666 (2020).
- 667 22. Messina, G. *et al.* The human Cranio Facial Development Protein 1 (Cfdp1) gene encodes  
668 a protein required for the maintenance of higher-order chromatin organization. *Sci. Rep.*  
669 **7**, 1–10 (2017).
- 670 23. Itoh, T. *et al.* Cfdp1 controls the cell cycle and neural differentiation in the zebrafish  
671 cerebellum and retina. *Dev. Dyn.* **250**, 1618–1633 (2021).
- 672 24. Giardoglou, P. & Beis, D. On zebrafish disease models and matters of the heart.  
673 *Biomedicines* vol. 7 (2019).

- 674 25. Bakkers, J. Zebrafish as a model to study cardiac development and human cardiac  
675 disease. *Cardiovasc. Res.* **91**, 279–288 (2011).
- 676 26. Bournele, D. & Beis, D. Zebrafish models of cardiovascular disease. *Heart Fail. Rev.* **21**,  
677 803–813 (2016).
- 678 27. Sehnert, A. J. *et al.* Cardiac troponin T is essential in sarcomere assembly and cardiac  
679 contractility. *Nat. Genet.* **31**, 106–110 (2002).
- 680 28. Aleström, P. *et al.* Zebrafish: Housing and husbandry recommendations. *Lab. Anim.* **54**,  
681 213–224 (2020).
- 682 29. Huang, C. J., Tu, C. T., Hsiao, C. Der, Hsieh, F. J. & Tsai, H. J. Germ-line transmission of a  
683 myocardium-specific GFP transgene reveals critical regulatory elements in the cardiac  
684 myosin light chain 2 promoter of zebrafish. *Dev. Dyn.* **228**, 30–40 (2003).
- 685 30. Lawson, N. D. & Weinstein, B. M. In vivo imaging of embryonic vascular development  
686 using transgenic zebrafish. *Dev. Biol.* **248**, 307–318 (2002).
- 687 31. Ninov, N., Borius, M. & Stainier, D. Y. R. Different levels of Notch signaling regulate  
688 quiescence, renewal and differentiation in pancreatic endocrine progenitors.  
689 *Development* **139**, 1557–1567 (2012).
- 690 32. Moro, E. *et al.* In vivo Wnt signaling tracing through a transgenic biosensor fish reveals  
691 novel activity domains. *Dev. Biol.* **366**, 327–340 (2012).
- 692 33. Westerfield, M. The zebrafish book. A guide for the laboratory use of zebrafish (*Danio*  
693 *rerio*). 4th ed. *Univ. Oregon Press. Eugene* (2000).
- 694 34. Grimes, A. C. *et al.* PCB126 exposure disrupts zebrafish ventricular and branchial but not  
695 early neural crest development. *Toxicol. Sci.* **106**, 193–205 (2008).
- 696 35. Hoage, T.; Ding, Y.; Xu, X. Cardiovascular development: structure and molecular  
697 mechanism. *Anat. Sci. Int.* **84**, 65–66 (2012).

- 698 36. Wu, W. H. *et al.* Swc2 is a widely conserved H2AZ-binding module essential for ATP-  
699 dependent histone exchange. *Nat. Struct. Mol. Biol.* **12**, 1064–1071 (2005).
- 700 37. Celauro, E., Carra, S., Rodriguez, A., Cotelli, F. & Dimitri, P. Functional analysis of the  
701 cfdp1 gene in zebrafish provides evidence for its crucial role in craniofacial development  
702 and osteogenesis. *Exp. Cell Res.* **361**, 236–245 (2017).
- 703 38. Walsh, E. C. & Stainier, D. Y. R. UDP-Glucose Dehydrogenase Required for Cardiac Valve  
704 Formation in Zebrafish. *Science (80-. ).* **293**, 1670–1673 (2001).
- 705 39. Pestel, J. *et al.* Real-time 3D visualization of cellular rearrangements during cardiac valve  
706 formation. *Dev.* **143**, 2217–2227 (2016).
- 707 40. Rossi, A. *et al.* Genetic compensation induced by deleterious mutations but not gene  
708 knockdowns. *Nature* **524**, 230–233 (2015).
- 709 41. Jao, L. E., Wente, S. R. & Chen, W. Efficient multiplex biallelic zebrafish genome editing  
710 using a CRISPR nuclease system. *Proc. Natl. Acad. Sci. U. S. A.* **110**, 13904–13909 (2013).
- 711 42. Dobrzycki, T., Krecsmarik, M. & Monteiro, R. Genotyping and quantification of in situ  
712 hybridization staining in zebrafish. *J. Vis. Exp.* 1–7 (2020) doi:10.3791/59956.
- 713 43. Rasouli, S. J. & Stainier, D. Y. R. Regulation of cardiomyocyte behavior in zebrafish  
714 trabeculation by Neuregulin 2a signaling. *Nat. Commun.* **8**, 1–11 (2017).
- 715 44. Liu, J. *et al.* A dual role for ErbB2 signaling in cardiac trabeculation. *Development* **137**,  
716 3867–3875 (2010).
- 717 45. Morillo-Huesca, M., Clemente-Ruiz, M., Andújar, E. & Prado, F. The SWR1 histone  
718 replacement complex causes genetic instability and genome-wide transcription  
719 misregulation in the absence of H2A.Z. *PLoS One* **5**, (2010).
- 720 46. Monte-nieto, G. *et al.* Control of cardiac jelly dynamics by NOTCH1 and NRG1 defines the  
721 building plan for trabeculation. *Nature* **557**, 439–445 (2018).

- 722 47. Nurnberg, S. T. *et al.* Genomic profiling of human vascular cells identifies TWIST1 as a  
723 causal gene for common vascular diseases. *PLoS Genet.* **16**, 1–22 (2020).
- 724 48. Klarin, D. *et al.* Genetic analysis in UK Biobank links insulin resistance and  
725 transendothelial migration pathways to coronary artery disease. *Nat. Genet.* **49**, 1392–  
726 1397 (2017).
- 727 49. Wild, P. S. *et al.* Large-scale genome-wide analysis identifies genetic variants associated  
728 with cardiac structure and function. *J. Clin. Invest.* **127**, 1798–1812 (2017).
- 729 50. Yue, M. S., Peterson, R. E. & Heideman, W. Dioxin inhibition of swim bladder  
730 development in zebrafish: Is it secondary to heart failure? *Aquat. Toxicol.* **162**, 10–17  
731 (2015).
- 732 51. Kurosaki, T. & Maquat, L. E. Nonsense-mediated mRNA decay in humans at a glance. *J.*  
733 *Cell Sci.* **129**, 461–467 (2016).
- 734 52. Khajavi, M., Inoue, K. & Lupski, J. R. Nonsense-mediated mRNA decay modulates clinical  
735 outcome of genetic disease. *Eur. J. Hum. Genet.* **14**, 1074–1081 (2006).
- 736 53. Miller, J. N. & Pearce, D. A. Nonsense-mediated decay in genetic disease: Friend or foe?  
737 *Mutat. Res. - Rev. Mutat. Res.* **762**, 52–64 (2014).
- 738 54. Nguyen, S. L., Wilkinson, F. M. & Gecz, J. Nonsense-mediated mRNA decay: inter-  
739 individual variability and human disease. *Neurosci Biobehav Rev.* **46**, 175–86 (2014).
- 740 55. Kerr, T. P., Sewry, C. A., Robb, S. A. & Roberts, R. G. Long mutant dystrophins and  
741 variable phenotypes: Evasion of nonsense-mediated decay? *Hum. Genet.* **109**, 402–407  
742 (2001).
- 743 56. Grego-Bessa, J. *et al.* Notch Signaling Is Essential for Ventricular Chamber Development.  
744 *Dev. Cell* **12**, 415–429 (2007).
- 745 57. Sandireddy, R. *et al.* Semaphorin 3E/PlexinD1 signaling is required for cardiac ventricular  
746 compaction. *JCI Insight* **4**, (2019).

- 747 58. Qu, X., Harmelink, C. & Scott Baldwin, H. Tie2 regulates endocardial sprouting and  
748 myocardial trabeculation. *JCI Insight* **4**, (2019).
- 749 59. Chen, H. *et al.* BMP10 is essential for maintaining cardiac growth during murine  
750 cardiogenesis. *Development* **131**, 2219–2231 (2004).
- 751 60. Gerety, S. S., Wang, H. U., Chen, Z. F. & Anderson, D. J. Symmetrical mutant phenotypes  
752 of the receptor EphB4 and its specific transmembrane ligand ephrin-B2 in cardiovascular  
753 development. *Mol. Cell* **4**, 403–414 (1999).
- 754 61. Lai, D. *et al.* Neuregulin 1 sustains the gene regulatory network in both trabecular and  
755 nontrabecular myocardium. *Circ. Res.* **107**, 715–727 (2010).
- 756 62. Gassmann, M. *et al.* Aberrant neural and cardiac development in mice lacking the ErbB4  
757 neuregulin receptor. **378**, 390–394 (1995).
- 758 63. Lee, K.-F. *et al.* Requirement for neuregulin receptor erbB2 in neural and cardiac  
759 development. *Nature* **378**, 394–398 (1995).
- 760 64. Wu, C. C. *et al.* Spatially Resolved Genome-wide Transcriptional Profiling Identifies BMP  
761 Signaling as Essential Regulator of Zebrafish Cardiomyocyte Regeneration. *Dev. Cell* **36**,  
762 36–49 (2016).
- 763 65. Peshkovsky, C., Totong, R. & Yelon, D. Dependence of cardiac trabeculation on  
764 neuregulin signaling and blood flow in zebrafish. *Dev. Dyn.* **240**, 446–456 (2011).
- 765 66. Sidhwani, P. & Yelon, D. *Fluid forces shape the embryonic heart: Insights from zebrafish.*  
766 *Current Topics in Developmental Biology* vol. 132 (Elsevier Inc., 2019).
- 767 67. Chi, N. C. *et al.* Genetic and physiologic dissection of the vertebrate cardiac conduction  
768 system. *PLoS Biol.* **6**, 1006–1019 (2008).
- 769 68. Staudt, D. W. *et al.* High-resolution imaging of cardiomyocyte behavior reveals two  
770 distinct steps in ventricular trabeculation. *Dev.* **141**, 585–593 (2014).

- 771 69. Paolini, A., Fontana, F., Rödel, C. & Seyfried, S. Mechanosensitive Notch-Dll4 and Klf2-  
772 Wnt9 Signaling Pathways Intersect in Guiding Valvulogenesis in Zebrafish. *Cell Rep.* **37**,  
773 (2021).
- 774 70. Gao, R. & Ren, J. Zebrafish Models in Therapeutic Research of Cardiac Conduction  
775 Disease. *Front. Cell Dev. Biol.* **9**, 1–10 (2021).
- 776 71. Ren, J. *et al.* Canonical Wnt5b Signaling Directs Outlying Nkx2.5+ Mesoderm into  
777 Pacemaker Cardiomyocytes. *Dev. Cell* **50**, 729–743.e5 (2019).
- 778 72. Liang, W. *et al.* Canonical Wnt signaling promotes pacemaker cell specification of cardiac  
779 mesodermal cells derived from mouse and human embryonic stem cells. *Stem Cells* **38**,  
780 352–368 (2020).
- 781 73. De Pater, E. *et al.* Distinct phases of cardiomyocyte differentiation regulate growth of the  
782 zebrafish heart. *Development* **136**, 1633–1641 (2009).
- 783 74. Burkhard, S. B. & Bakkers, J. Spatially resolved RNA-sequencing of the embryonic heart  
784 identifies a role for Wnt/ $\beta$ -catenin signaling in autonomic control of heart rate. *Elife* **7**, 1–  
785 19 (2018).
- 786 75. Gillers, B. S. *et al.* Canonical Wnt signaling regulates atrioventricular junction  
787 programming and electrophysiological properties. *Circ. Res.* **116**, 398–406 (2014).

788

789 **Funding:** This research is co-financed by Greece and the European Union  
790 (European Social Fund- ESF) through the Operational Programme «Human  
791 Resources Development, Education and Lifelong Learning» in the context  
792 of the project “Strengthening Human Resources Research Potential via  
793 Doctorate Research” (MIS-5000432), implemented by the State  
794 Scholarships Foundation (IKY)

795

796

797 **Figure Legends**

798

799 *Figure 1:* Expression analysis of *cfdp1* in different zebrafish development stages show that *cfdp1*  
800 is apparent during early development. A, Whole mount *in situ* hybridization of *cfdp1* in wild-  
801 type zebrafish embryos at different development stages (i-v). Higher magnification of iv and v  
802 shown in iv' and v' panels, respectively. Arrows point at the region of the heart. The expression  
803 of the gene is apparent from the 24 hpf and is restricted at the region of the head and the heart  
804 by 120 hpf. Scale bar (i-v) 150  $\mu\text{m}$ , Scale bar (iv'-v') 200  $\mu\text{m}$ . B, Temporal expression analysis of  
805 *cfdp1* via RT-PCR compared to *actin b* house keeping gene. C, Upper: Illustration of frontal  
806 cutting plane of zebrafish, Lower: Paraffin sections of 120hpf ISH-stained embryos with *cfdp1*  
807 antisense RNA probe and *cfdp1* sense RNA (negative control). Arrows point at the stained  
808 embryonic heart. Scale bar: 50  $\mu\text{m}$

809

810 *Figure 2:* Silencing of *cfdp1* expression via morpholino microinjections. A, Stereoscopic images  
811 of representative 120hpf *cfdp1*-MO injected and uninjected control embryos. Black arrows  
812 point swim bladder, yellow arrows point pericardiac oedema, red arrows point mouth opening  
813 position. Scale bar 150  $\mu\text{m}$ . A', Quantification of phenotypic scoring via GraphPad Prism. B,  
814 Wnt/ $\beta$ -catenin activity is diminished in *cfdp1* morphants compared to the uninjected sibling  
815 controls. Max projection of z-stack confocal images of 72hpf *cfdp1*-MO embryos. Endothelial  
816 cells are labeled with green (Tg(*fli1:EGFP*)) and Wnt-activated cells are labeled with red  
817 (Tg(7xTCF-Xla.Siam:nlsCherry)). B' percentage of phenotypic scoring. AV, atrioventricular  
818 valve. B, bulbus arteriosus. Scale bar 150  $\mu\text{m}$ . C, Notch signaling remains unaffected in *cfdp1*  
819 morphants compared to the uninjected sibling controls. Max projection of z-stack confocal  
820 images of 72hpf *cfdp1*-MO embryos. Ventricular cardiomyocytes are labeled with green  
821 (Tg(*myl7:GFP*)) and Notch-activated cells are labeled with red (Tg(*tp1:mCherry*)). Scale bar 150  
822  $\mu\text{m}$

823

824 *Figure 3: Generation of *cfdp1* zebrafish mutant line. A, Schematic representation of zebrafish*  
825 **cfdp1* gene. For generation of CRISPR/Cas9-mediated mutant line, a target site in exon 3 was*  
826 *selected. B, Schematic representation of strategy for CRISPR/Cas9-mediated zebrafish line. The*  
827 *injection mix of gRNA /Cas9 in injected at the one-cell stage embryos. The crispants (F0*  
828 *injected) grow until adulthood and are crossed with wild-type adults. The F1 generation is being*  
829 *genotyped in order to identify possible Founders of the line. After the identification, the*  
830 *corresponding F1 heterozygous generation in kept for further analysis. C, Upper: Nucleotide*  
831 *alignment between *cfdp1* mutant and *cfdp1* wild-type sequence. A 5bp deletion in *cfdp1**  
832 *mutant is detected. Lower: Chromatogram of sanger sequencing of *cfdp1* mutant and *cfdp1**  
833 *wild-type sequence and the corresponding aa they encode. In *cfdp1* mutant, at the point of*  
834 *DNA break, there is an insertion of seven novels aa and an early stop codon*

835

836 *Figure 4: Impaired cardiac performance of *cfdp1* mutant embryonic hearts. A, *cfdp1*-MO*  
837 *injections in siblings embryos derived from cross between heterozygous *cfdp1* adult fish. Black*  
838 *arrows point swim bladder, yellow arrows point pericardiac oedema, red arrows point mouth*  
839 *opening position. A', Quantification of phenotype scoring of *cfdp1* siblings (pool of all three*  
840 *genotypes: *cfdp1*<sup>-/-</sup>, *cfdp1*<sup>+/-</sup>, *cfdp1*<sup>+/+</sup>) and *cfdp1*-MO injected *cfdp1* sibling embryos. Scale bar*  
841 *150 μm. B, Defective cardiac performance of 120hpf *cfdp1*<sup>-/-</sup> embryos compared to their siblings*  
842 **cfdp1*<sup>+/+</sup> based on ventricular measurements after recording their heart rate. B', Bright field and*  
843 *fluorescent image of *cfdp1* mutant embryos utilizing their Tg(*myl7:EGFP*) (also referred as*  
844 **cmhc2*) background. Dashed lines indicate long and short ventricular axis, respectively.*

845

846 *Figure 5: Study of *cfdp1*<sup>+/-</sup> embryonic and adult hearts. A, Expression of *cfdp1* in *cfdp1* siblings*  
847 *(pool of three genotypes: *cfdp1*<sup>-/-</sup>, *cfdp1*<sup>+/-</sup>, *cfdp1*<sup>+/+</sup>). After performing *in situ hybridization* using*  
848 **cfdp1* RNA probe in *cfdp1* siblings at 120hpf, ISH signal intensity was quantified. The *cfdp1* low-*  
849 *and no- ISH signal embryos were genotyped and it was confirmed that they corresponded to*  
850 **cfdp1*<sup>-/-</sup> and *cfdp1*<sup>+/-</sup> embryos. B, H&E staining of 5μm paraffin embedded cardiac slices of*  
851 **cfdp1*<sup>+/+</sup> and *cfdp1*<sup>+/-</sup> adult hearts. Scale bar 50μm.*



852

853 *Figure 6: cfdp1* abrogation show impaired Wnt/ $\beta$ -catenin signaling whereas Notch pathway  
854 remains unaffected. A, Confocal images of 120hpf *cfdp1* mutant and wild-type siblings  
855 expressing *Tg(Tcf:dsred)* in Wnt-activated cells and *Tg(cmlc2:eGFP)* in all cardiomyocytes. Scale  
856 bar: 50 $\mu$ m. B, Confocal images of 120hpf *cfdp1* mutant and wild-type siblings expressing  
857 *Tg(TP1:mcherry)* in Notch-activated cells and *Tg(cmlc2:eGFP)* in all cardiomyocytes. A: atrium,  
858 V: ventricle, B: bulbus arteriosus, Scale bar: 50 $\mu$ m.

859

860 *Figure 7: cfdp1* is required for proper cardiac trabeculation A, Schematic representation of  
861 retrospective analysis. B, Single confocal plane of fluorescent phalloidin staining (actin  
862 filaments) in 120hpf *cfdp1* embryos, expressing *Tg(cmlc2:eGFP)* in all cardiomyocytes. Asterisks:  
863 trabeculae cardiomyocytes, AV: atrioventricular, OFT: outflow tract. Scale bar:50 $\mu$ m.

864

865

866

A

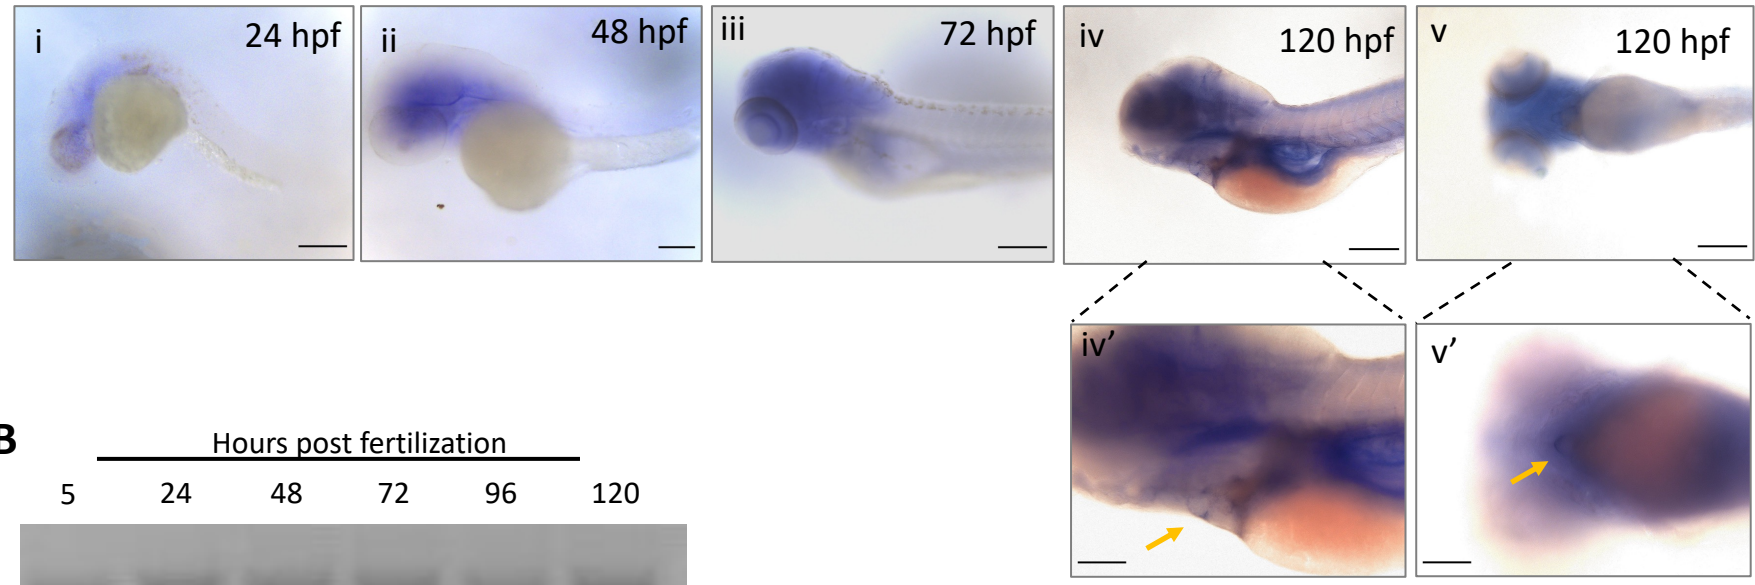

B

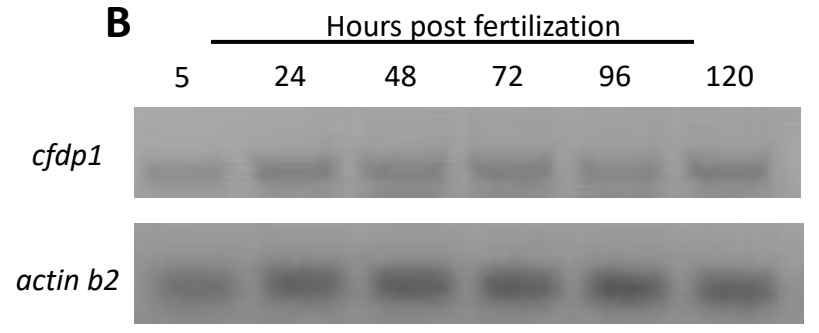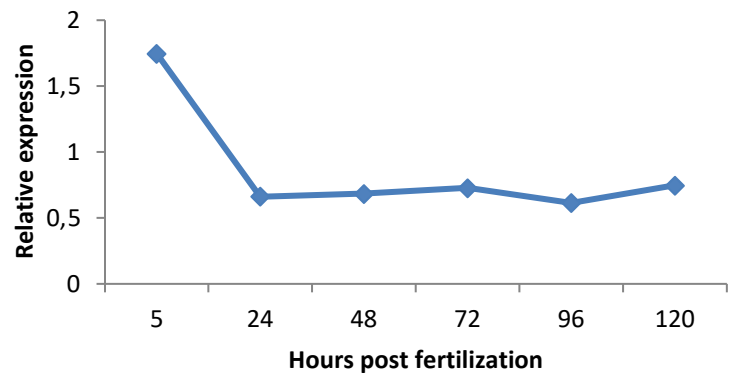

C

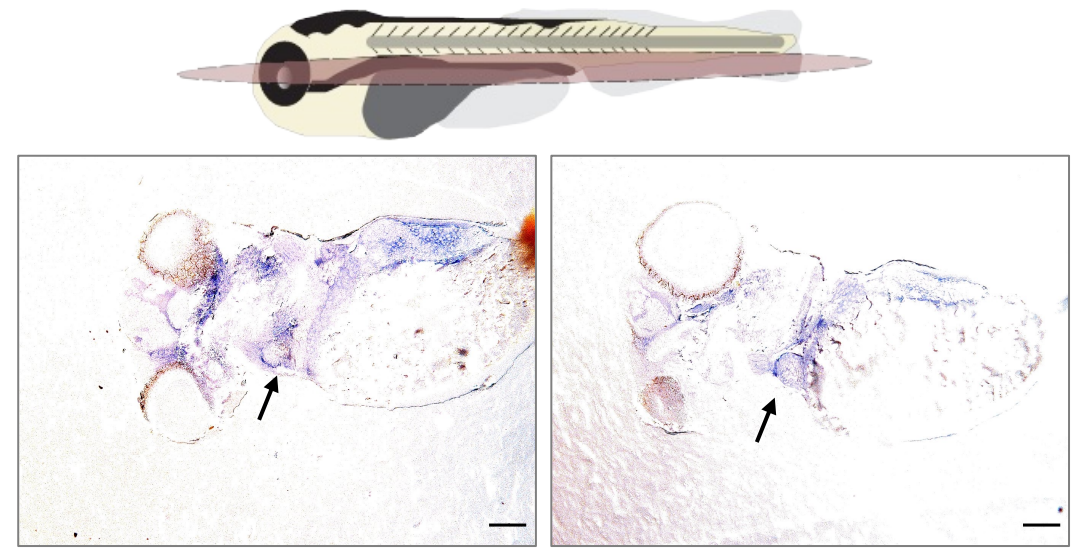

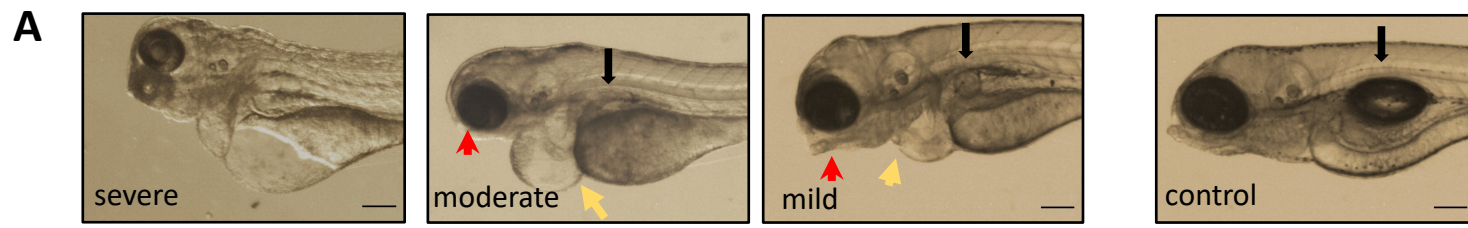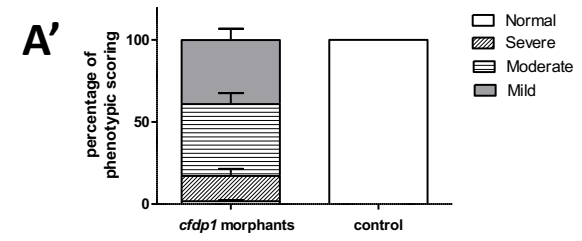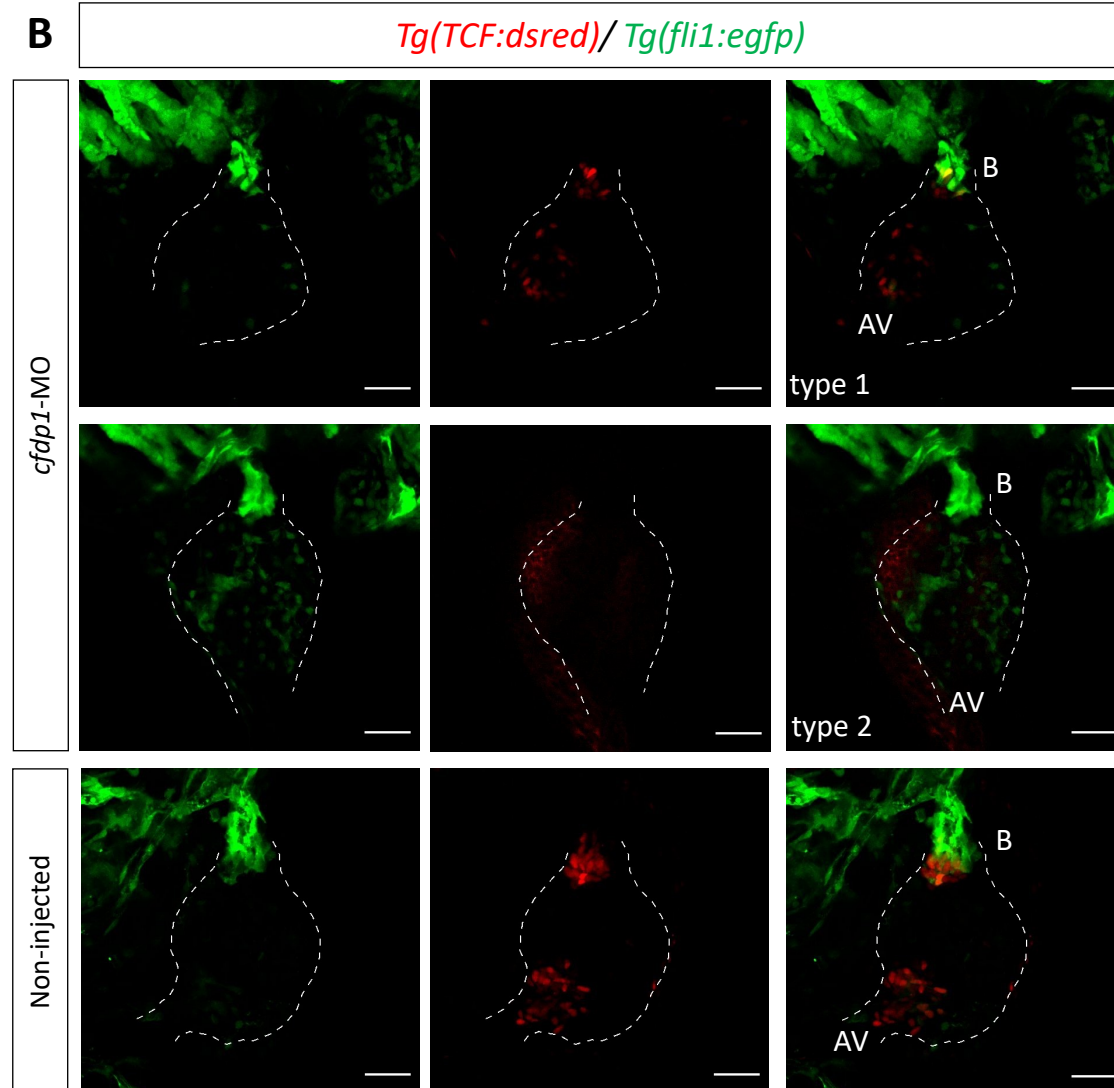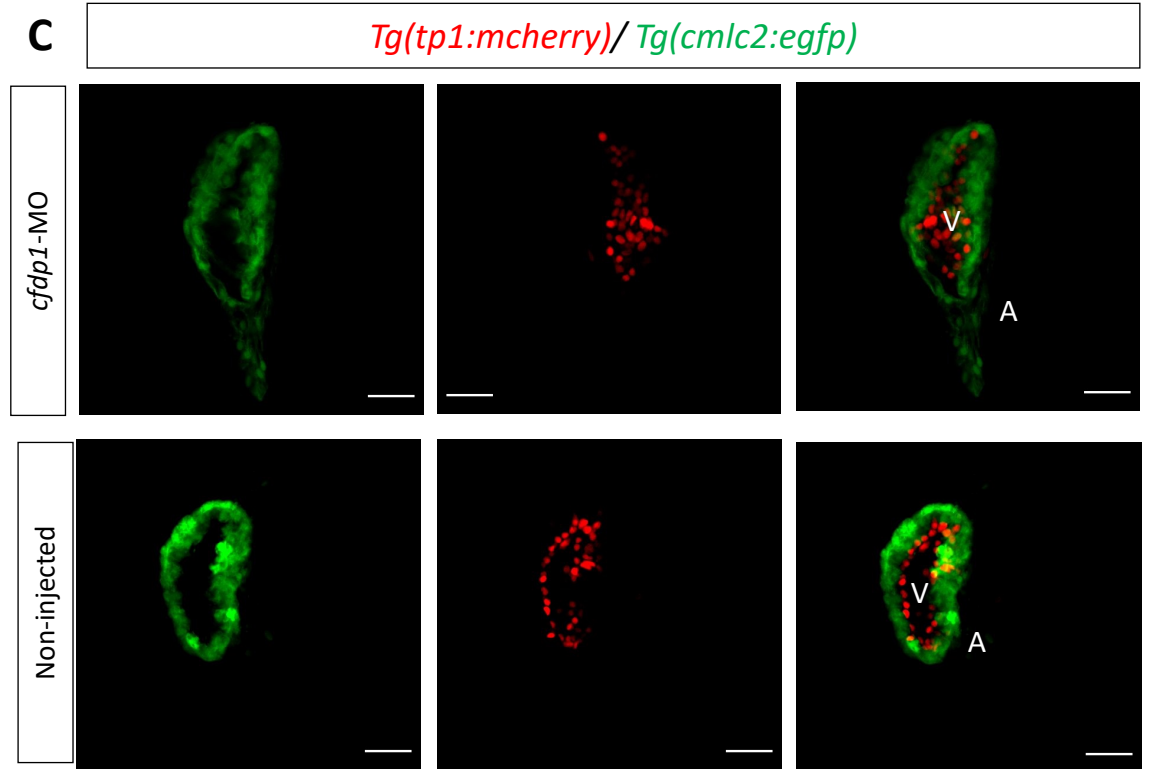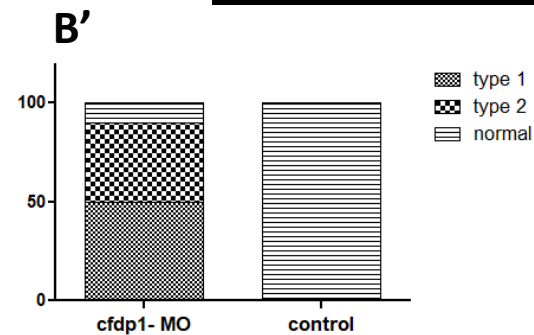

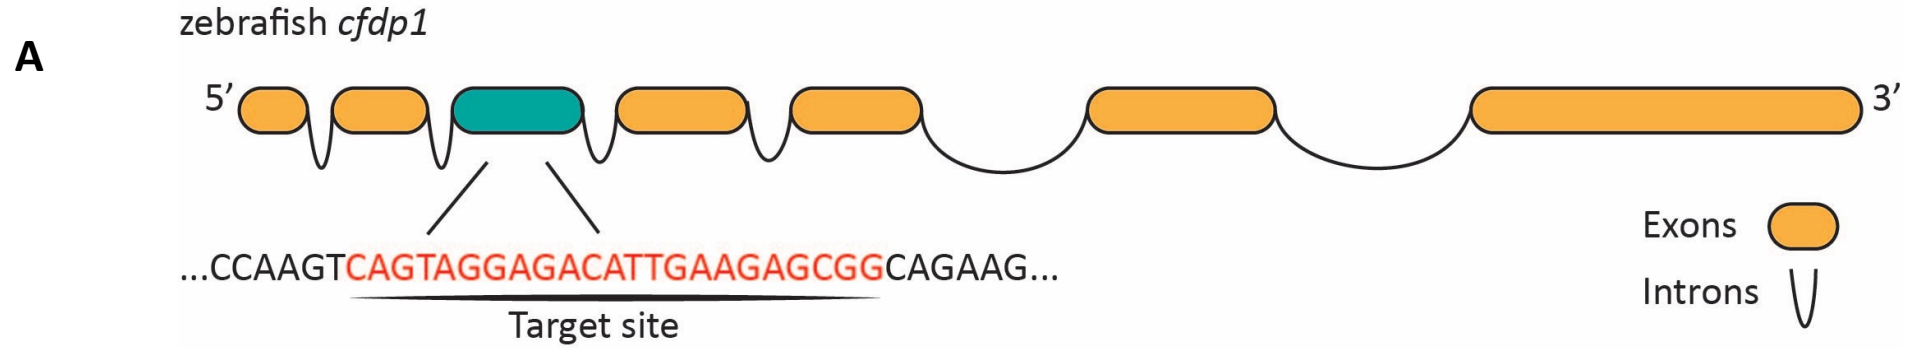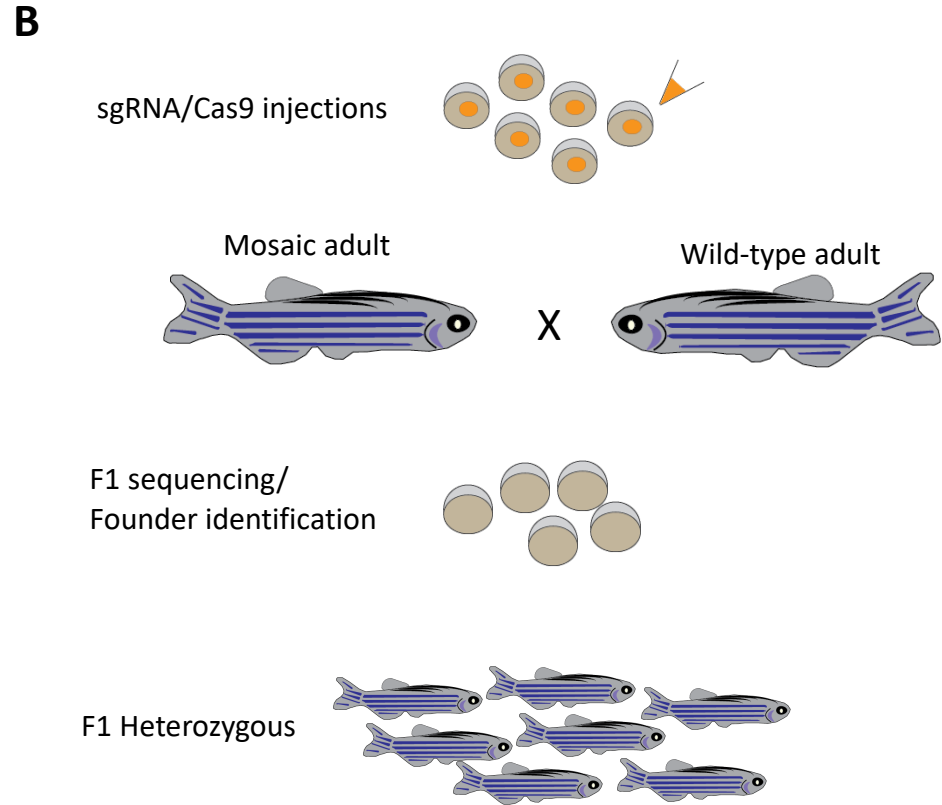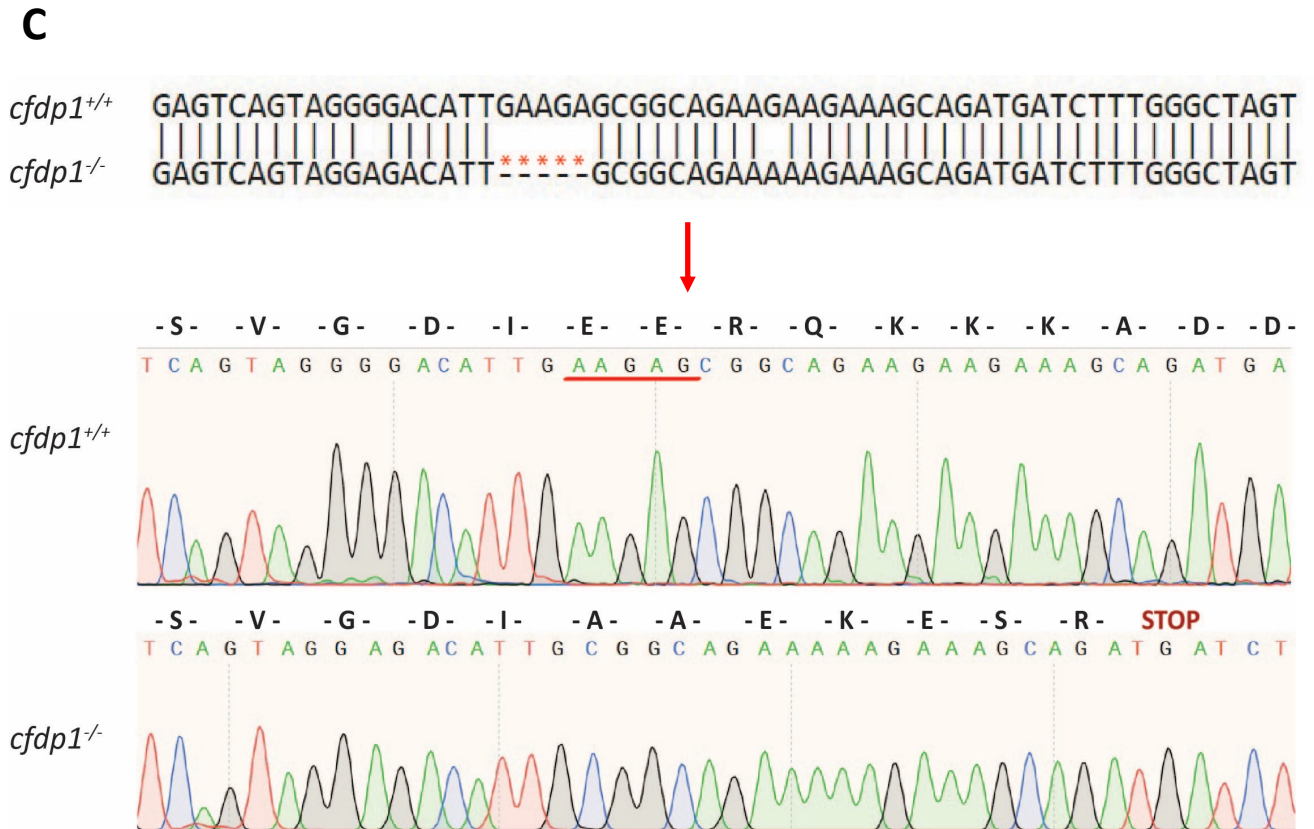



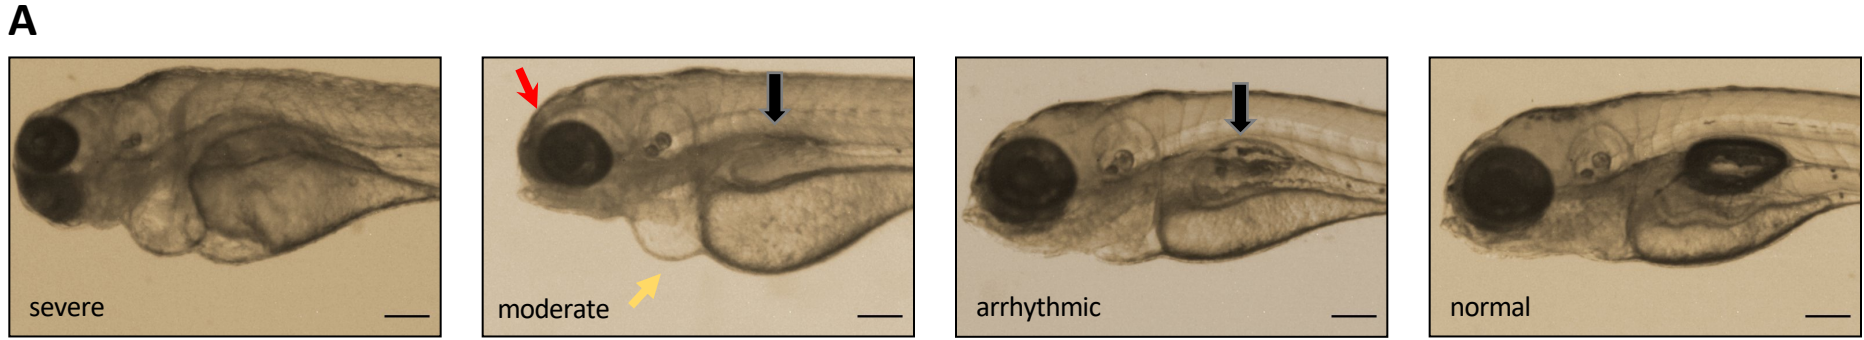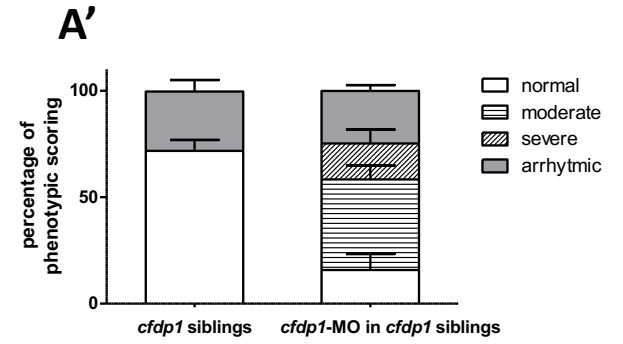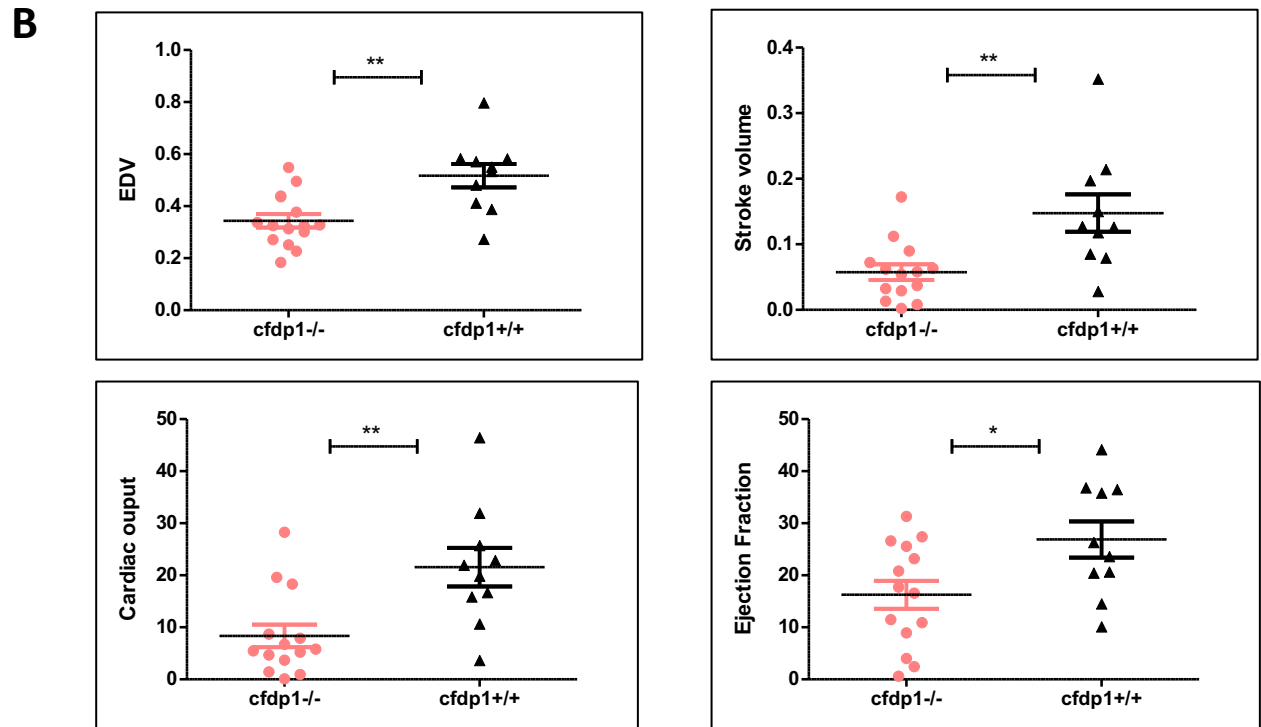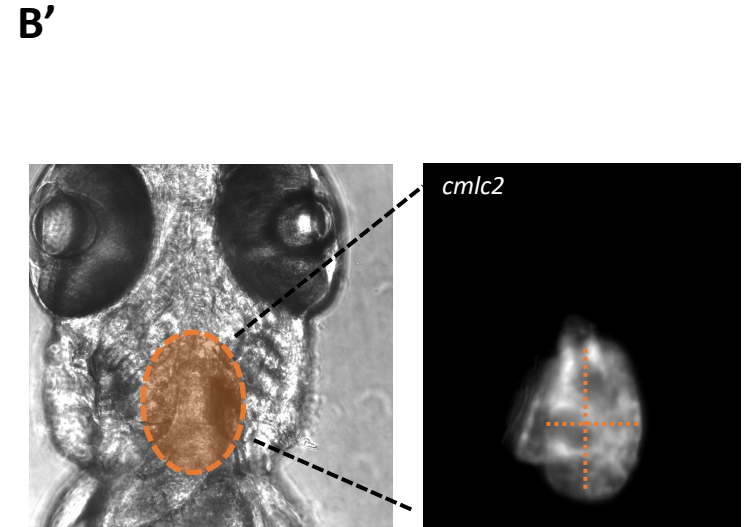

A

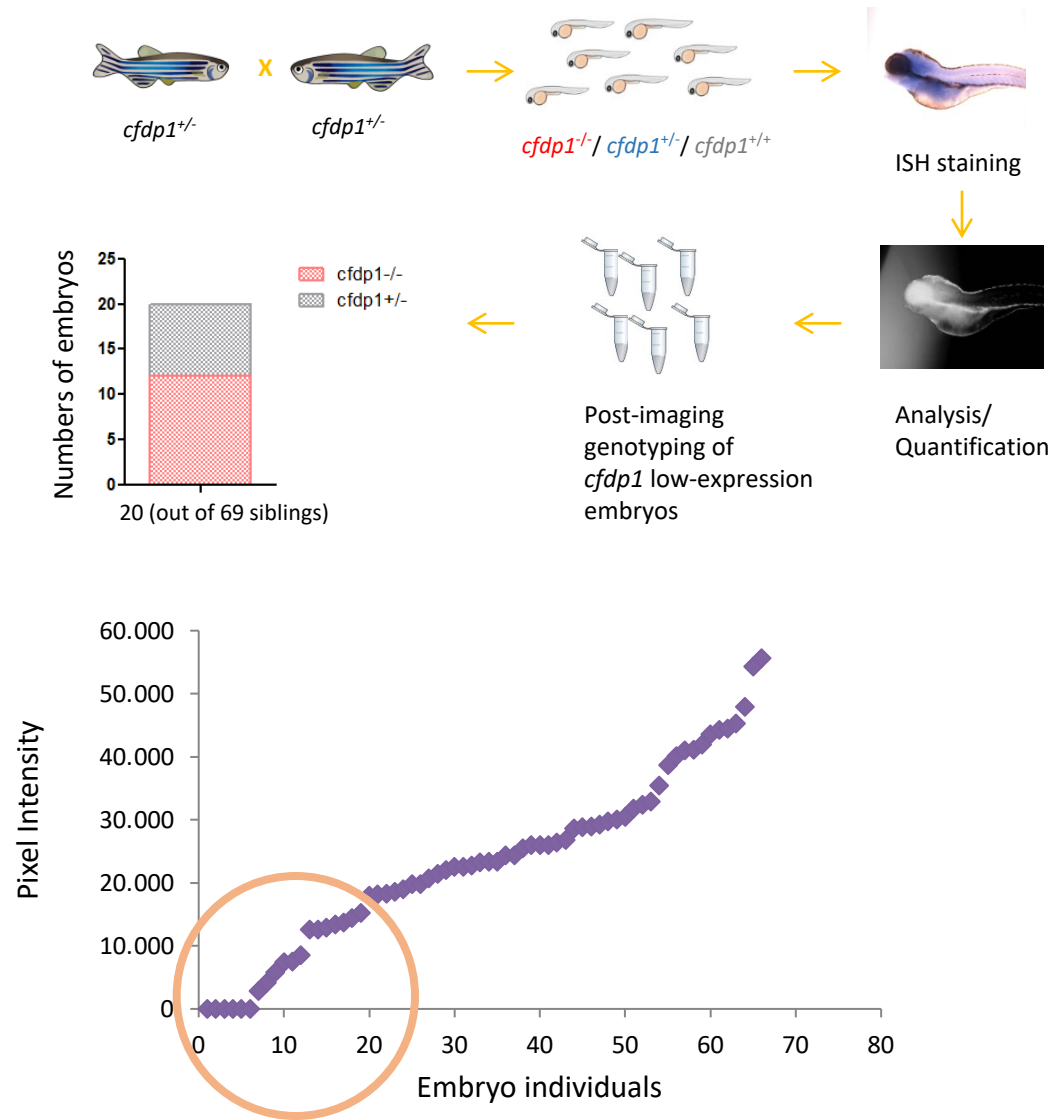

B

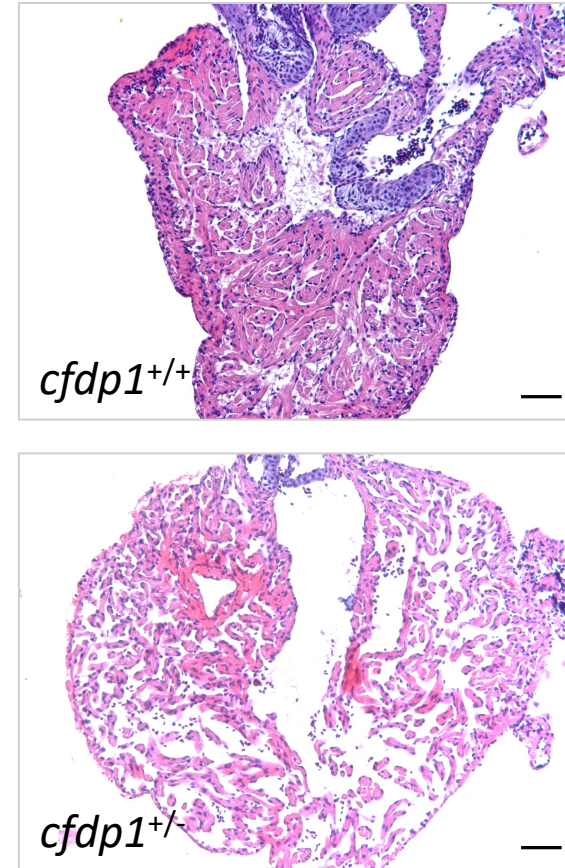

**A** *Tg(cmlc2:gfp) / Tg(TCF:dsred)*

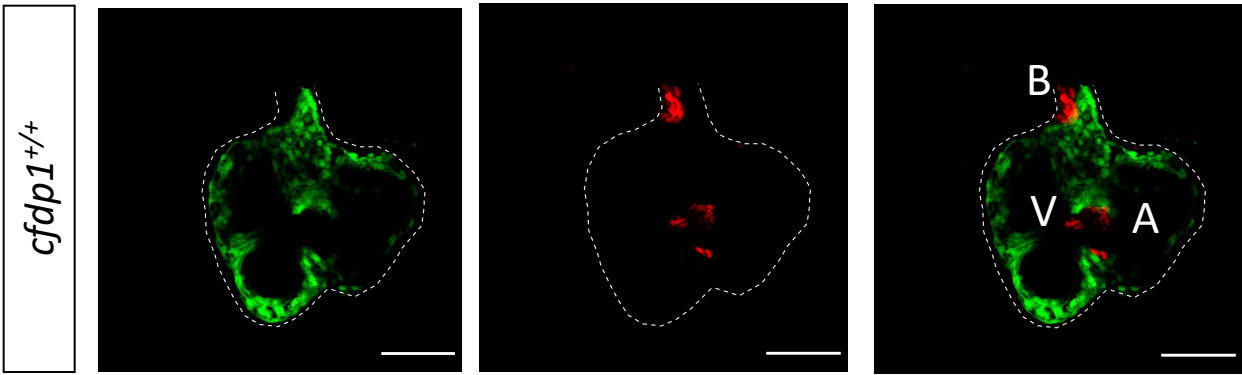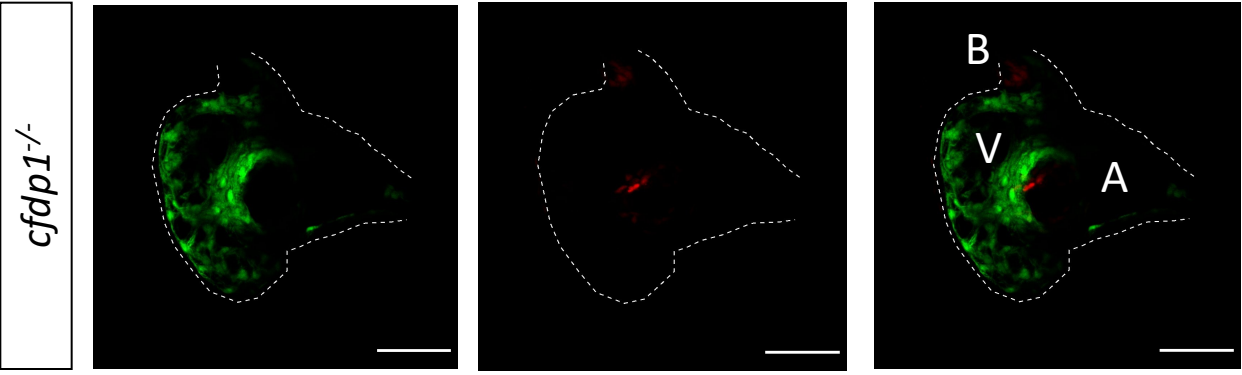

**B** *Tg(cmlc2:gfp) / Tg(TP1:mcherry)*

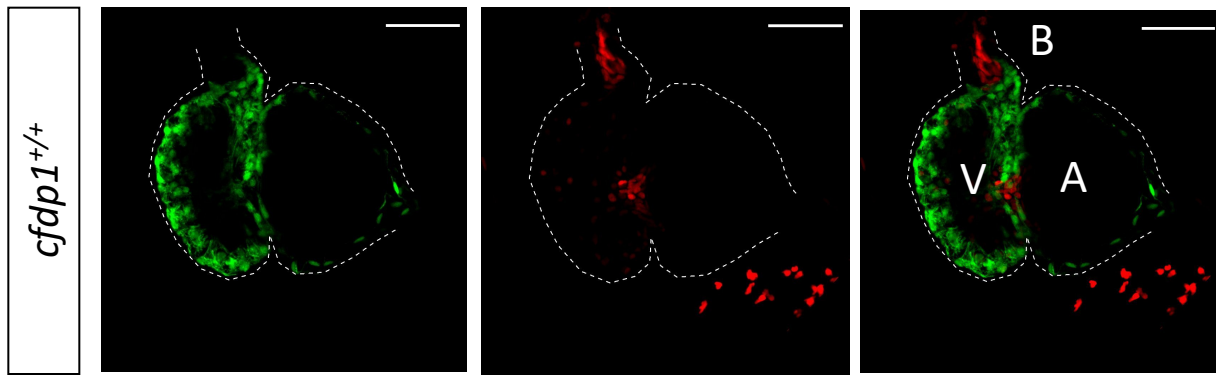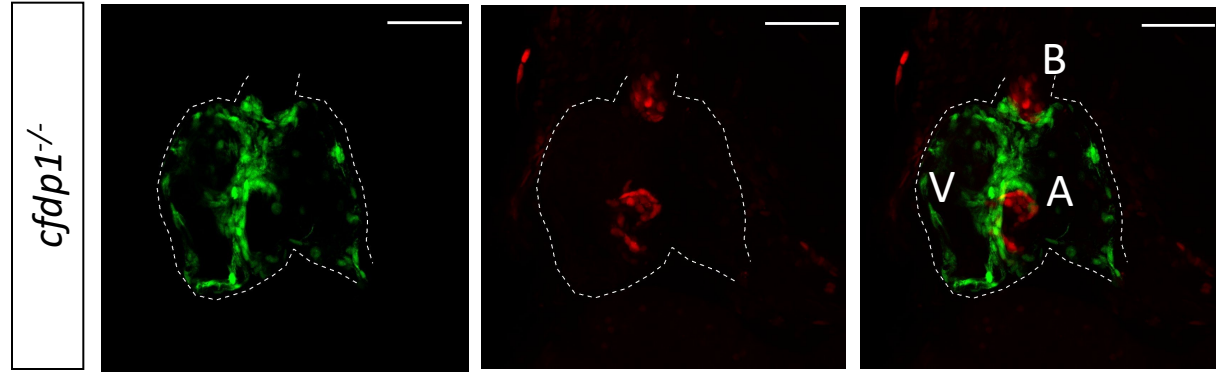

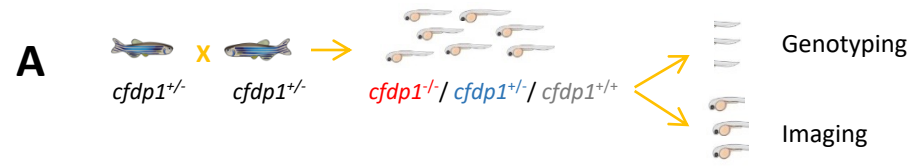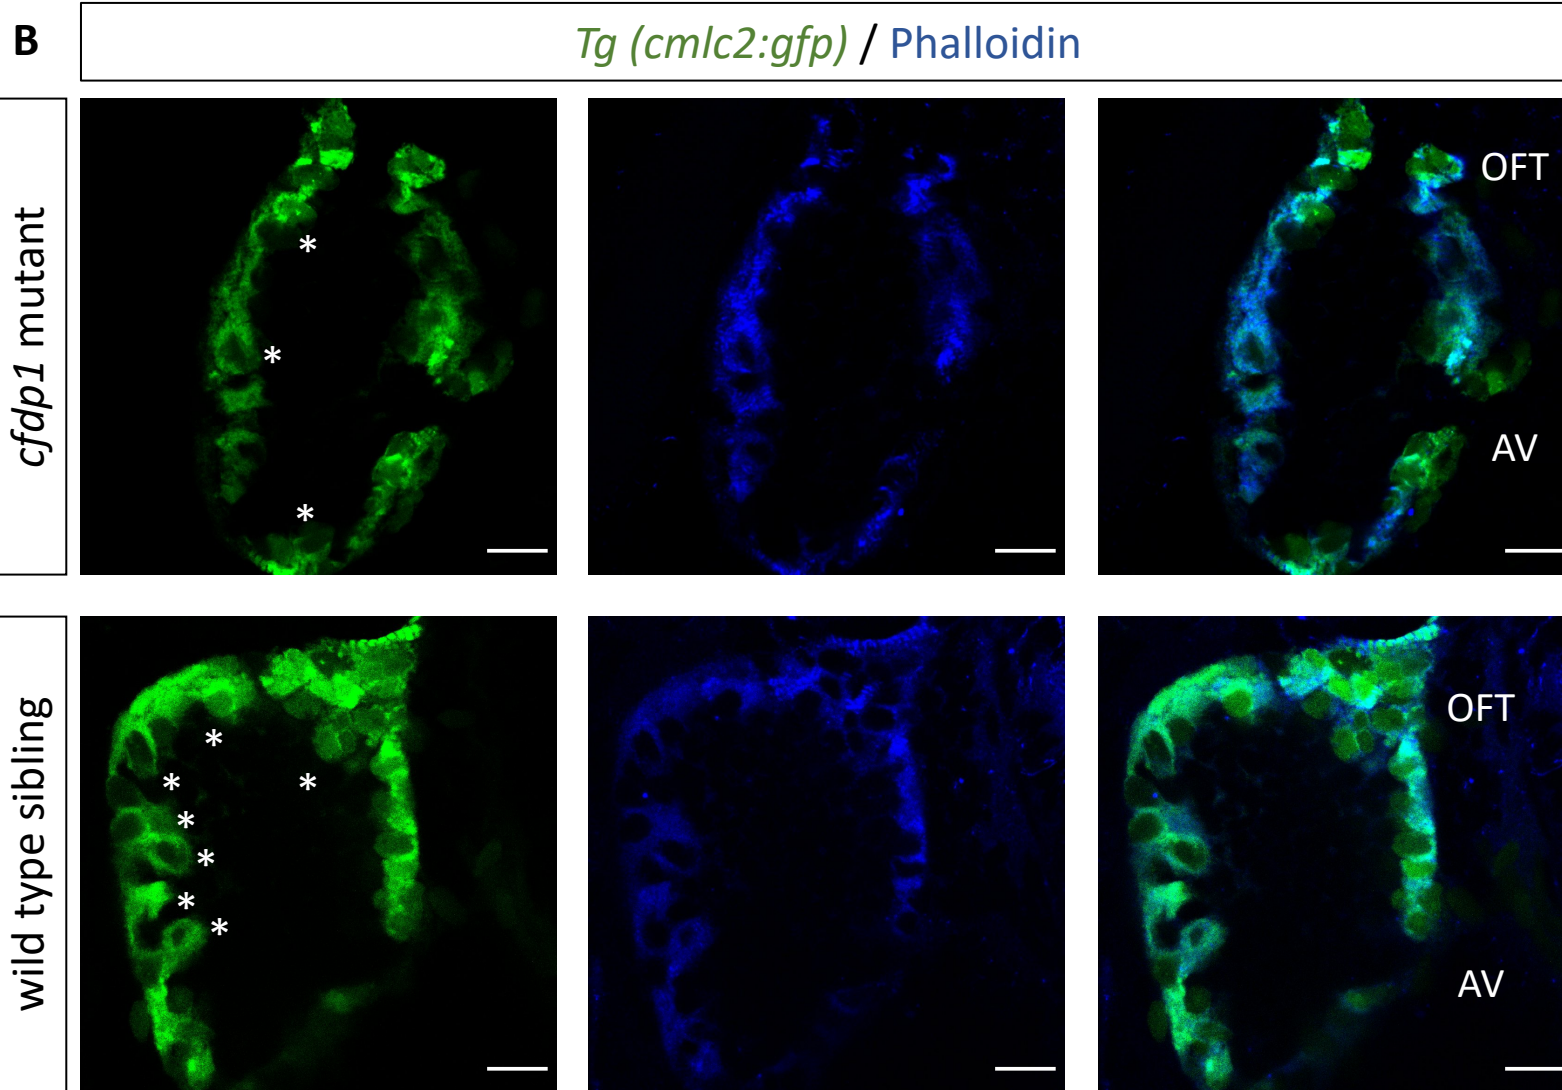

Source: https://www.biorxiv.org/content/10.1101/2022.03.21.485062v1.full.pdf
